# Supplementary material for: Optically active bis(aminophenols) and their metal complexes
Source: Royal Society of Chemistry journal article supplement (doi:10.1039/d3dt02436a), 2023-01-01
Supplement: d3dt02436a1.pdf [file d3dt02436a1.pdf]

## Electronic Supporting Information for

### Optically active bis(aminophenols) and their metal complexes

Halen Carbonel, Timothy D. Mikulski, Kahargyan Nugraha, James Johnston, Yichun Wang and Seth N. Brown\*

251 Nieuwland Science Hall  
Department of Chemistry and Biochemistry  
University of Notre Dame  
Notre Dame, Indiana 46556-5670 USA  
E-mail: Seth.N.Brown.114@nd.edu

#### Contents:

#### I. Additional crystallographic information

|                   |                                                                                                                                                             |    |
|-------------------|-------------------------------------------------------------------------------------------------------------------------------------------------------------|----|
| <b>Figure S1.</b> | Thermal ellipsoid plot of ( <i>R</i> )-BiniqH <sub>4</sub> • CH <sub>3</sub> OH • PhCH <sub>3</sub> showing hydrogen bonding interactions                   | S4 |
| <b>Figure S2.</b> | Thermal ellipsoid plot of ( <i>R,R</i> )-2,3-C <sub>4</sub> H <sub>8</sub> (O <sub>2</sub> CC <sub>6</sub> H <sub>4</sub> -2-NH <sub>2</sub> ) <sub>2</sub> | S4 |
| <b>Figure S3.</b> | Thermal ellipsoid plot of second molecule of ( <i>C,R,R</i> )-(Bdan)Pd                                                                                      | S5 |
| <b>Figure S4.</b> | Thermal ellipsoid plot of second molecule in crystal of ( <i>C,R,R</i> )-(Bdan)OsO                                                                          | S5 |
| <b>Figure S5.</b> | Thermal ellipsoid plot of ( <i>C,R,R</i> )-(Bdan)OsO in crystal of ( <i>C,R,R</i> )-(Bdan)OsO • ( <i>A,R,R</i> )-(Bdan)OsO                                  | S6 |

#### II. <sup>1</sup>H NMR spectra

|                    |                                                                                                                                                                  |     |
|--------------------|------------------------------------------------------------------------------------------------------------------------------------------------------------------|-----|
| <b>Figure S6.</b>  | <sup>1</sup> H NMR spectrum of ( <i>R</i> )-BiniqH <sub>4</sub>                                                                                                  | S7  |
| <b>Figure S7.</b>  | <sup>1</sup> H NMR spectrum of ( <i>R,R</i> )-2,3-C <sub>4</sub> H <sub>8</sub> (O <sub>2</sub> CC <sub>6</sub> H <sub>4</sub> -2-NH <sub>2</sub> ) <sub>2</sub> | S8  |
| <b>Figure S8.</b>  | Simulation of coupling in ( <i>R,R</i> )-2,3-C <sub>4</sub> H <sub>8</sub> (O <sub>2</sub> CC <sub>6</sub> H <sub>4</sub> -2-NH <sub>2</sub> ) <sub>2</sub>      | S8  |
| <b>Figure S9.</b>  | <sup>1</sup> H NMR spectrum of ( <i>R,R</i> )-BdanH <sub>4</sub>                                                                                                 | S9  |
| <b>Figure S10.</b> | Simulation of coupling in ( <i>R,R</i> )-BdanH <sub>4</sub>                                                                                                      | S9  |
| <b>Figure S11.</b> | <sup>1</sup> H NMR spectrum of ( <i>R</i> )-(Biniq)Pd                                                                                                            | S10 |
| <b>Figure S12.</b> | <sup>1</sup> H NMR spectrum of ( <i>R</i> )-(Biniq)Pt                                                                                                            | S10 |
| <b>Figure S13.</b> | <sup>1</sup> H NMR spectrum of ( <i>C,R,R</i> )-(Bdan)Pd                                                                                                         | S11 |
| <b>Figure S14.</b> | Simulation of coupling in ( <i>C,R,R</i> )-(Bdan)Pd                                                                                                              | S11 |
| <b>Figure S15.</b> | <sup>1</sup> H NMR spectrum of ( <i>C,R,R</i> )-(Bdan)OsO                                                                                                        | S12 |
| <b>Figure S16.</b> | Simulation of coupling in ( <i>C,R,R</i> )-(Bdan)OsO                                                                                                             | S12 |
| <b>Figure S17.</b> | Simulation of coupling in (Egan)OsO                                                                                                                              | S13 |

#### III. <sup>13</sup>C{<sup>1</sup>H} NMR spectra

|                    |                                                                                                                                                                                    |     |
|--------------------|------------------------------------------------------------------------------------------------------------------------------------------------------------------------------------|-----|
| <b>Figure S18.</b> | <sup>13</sup> C{ <sup>1</sup> H} NMR spectrum of ( <i>R</i> )-BiniqH <sub>4</sub>                                                                                                  | S14 |
| <b>Figure S19.</b> | <sup>13</sup> C{ <sup>1</sup> H} NMR spectrum of ( <i>R,R</i> )-2,3-C <sub>4</sub> H <sub>8</sub> (O <sub>2</sub> CC <sub>6</sub> H <sub>4</sub> -2-NH <sub>2</sub> ) <sub>2</sub> | S14 |
| <b>Figure S20.</b> | <sup>13</sup> C{ <sup>1</sup> H} NMR spectrum of ( <i>R,R</i> )-BdanH <sub>4</sub>                                                                                                 | S15 |
| <b>Figure S21.</b> | <sup>13</sup> C{ <sup>1</sup> H} NMR spectrum of ( <i>R</i> )-(Biniq)Pd                                                                                                            | S15 |

|                                                                              |                                                                                                                                                  |     |
|------------------------------------------------------------------------------|--------------------------------------------------------------------------------------------------------------------------------------------------|-----|
| <b>Figure S22.</b>                                                           | $^{13}\text{C}\{^1\text{H}\}$ NMR spectrum of ( <i>R</i> )-(Biniq)Pt                                                                             | S16 |
| <b>Figure S23.</b>                                                           | $^{13}\text{C}\{^1\text{H}\}$ NMR spectrum of ( <i>C,R,R</i> )-(Bdan)Pd                                                                          | S16 |
| <b>Figure S24.</b>                                                           | $^{13}\text{C}\{^1\text{H}\}$ NMR spectrum of ( <i>C,R,R</i> )-(Bdan)OsO                                                                         | S17 |
| <b>IV. IR spectra</b>                                                        |                                                                                                                                                  |     |
| <b>Figure S25.</b>                                                           | IR spectrum of ( <i>R</i> )-BiniqH <sub>4</sub>                                                                                                  | S18 |
| <b>Figure S26.</b>                                                           | IR spectrum of ( <i>R,R</i> )-2,3-C <sub>4</sub> H <sub>8</sub> (O <sub>2</sub> CC <sub>6</sub> H <sub>4</sub> -2-NH <sub>2</sub> ) <sub>2</sub> | S18 |
| <b>Figure S27.</b>                                                           | IR spectrum of ( <i>R,R</i> )-BdanH <sub>4</sub>                                                                                                 | S18 |
| <b>Figure S28.</b>                                                           | IR spectrum of ( <i>R</i> )-(Biniq)Pd                                                                                                            | S19 |
| <b>Figure S29.</b>                                                           | IR spectrum of ( <i>R</i> )-(Biniq)Pt                                                                                                            | S19 |
| <b>Figure S30.</b>                                                           | IR spectrum of ( <i>C,R,R</i> )-(Bdan)Pd                                                                                                         | S20 |
| <b>Figure S31.</b>                                                           | IR spectrum of ( <i>C,R,R</i> )-(Bdan)OsO                                                                                                        | S20 |
| <b>V. Electrochemistry</b>                                                   |                                                                                                                                                  |     |
| <b>Figure S32.</b>                                                           | CV of ( <i>C,R,R</i> )-(Bdan)Pd                                                                                                                  | S21 |
| <b>Figure S33.</b>                                                           | CV of ( <i>R</i> )-(Biniq)Pd                                                                                                                     | S21 |
| <b>VI. Variable-temperature NMR spectroscopy</b>                             |                                                                                                                                                  |     |
| <b>Figure S34.</b>                                                           | Variable-temperature <sup>1</sup> H NMR spectra of ( <i>C,R,R</i> )-(Bdan)Pd                                                                     | S22 |
| <b>Figure S35.</b>                                                           | Temperature-dependent chemical shifts in ( <i>R</i> )-(Biniq)Pd                                                                                  | S22 |
| <b>Figure S36.</b>                                                           | Temperature-dependent chemical shifts in ( <i>C,R,R</i> )-(Bdan)Pd                                                                               | S23 |
| <b>Table S1.</b>                                                             | Parameters describing temperature-dependent chemical shifts of ( <i>R</i> )-(Biniq)Pd and ( <i>C,R,R</i> )-(Bdan)Pd                              | S23 |
| <b>VII. Details of assignments of optical and chiroptical spectra</b>        |                                                                                                                                                  |     |
| <b>Table S2.</b>                                                             | Assignments for ( <i>C,R,R</i> )-(Bdan)Pd                                                                                                        | S24 |
| <b>Table S3.</b>                                                             | Assignments for ( <i>R</i> )-(Biniq)Pd                                                                                                           | S24 |
| <b>Table S4.</b>                                                             | Assignments for ( <i>R</i> )-(Biniq)Pt                                                                                                           | S24 |
| <b>Table S5.</b>                                                             | Assignments for ( <i>C,R,R</i> )-(Bdan)OsO                                                                                                       | S24 |
| <b>VIII. Structural comparison between (Clip)M and (Biniq)M (M = Pd, Pt)</b> |                                                                                                                                                  |     |
| <b>Figure S37.</b>                                                           | Overlay of ( <i>R</i> )-(Clip)Pd and ( <i>R</i> )-(Biniq)Pd                                                                                      | S25 |
| <b>Figure S38.</b>                                                           | Overlay of ( <i>R</i> )-(Clip)Pt and ( <i>R</i> )-(Biniq)Pt                                                                                      | S25 |
| <b>Table S6.</b>                                                             | Selected metrical data for calculated (Clip)M and (Biniq)M                                                                                       | S26 |
| <b>IX. Energies and Cartesian coordinates of calculated structures</b>       |                                                                                                                                                  |     |
| <b>A.</b>                                                                    | ( <sup>H</sup> ap) <sub>2</sub> Pd                                                                                                               | S27 |
| <b>B.</b>                                                                    | ( <i>C,R,R</i> )-(Bdan)Pd                                                                                                                        | S28 |
| <b>C.</b>                                                                    | ( <i>C,R,R</i> )-(Bdan)Pd triplet                                                                                                                | S30 |
| <b>D.</b>                                                                    | ( <i>A,R,R</i> )-(Bdan)Pd                                                                                                                        | S32 |
| <b>E.</b>                                                                    | (Clip)Pd                                                                                                                                         | S34 |
| <b>F.</b>                                                                    | (Biniq)Pd                                                                                                                                        | S35 |
| <b>G.</b>                                                                    | (Biniq)Pd triplet                                                                                                                                | S37 |
| <b>H.</b>                                                                    | ( <sup>H</sup> ap) <sub>2</sub> Pt                                                                                                               | S38 |
| <b>I.</b>                                                                    | (Clip)Pt                                                                                                                                         | S40 |
| <b>J.</b>                                                                    | (Biniq)Pt                                                                                                                                        | S41 |

**K.**  $(C,R,R)$ -(Bdan)OsO

S43

**L.**  $(A,R,R)$ -(Bdan)OsO

S45

**References**

S47

## I. Additional crystallographic information

**Figure S1.** Thermal ellipsoid plot of (*R*)-BiniqH<sub>4</sub> • CH<sub>3</sub>OH • PhCH<sub>3</sub> showing hydrogen bonding interactions. The toluene of solvation is not shown.

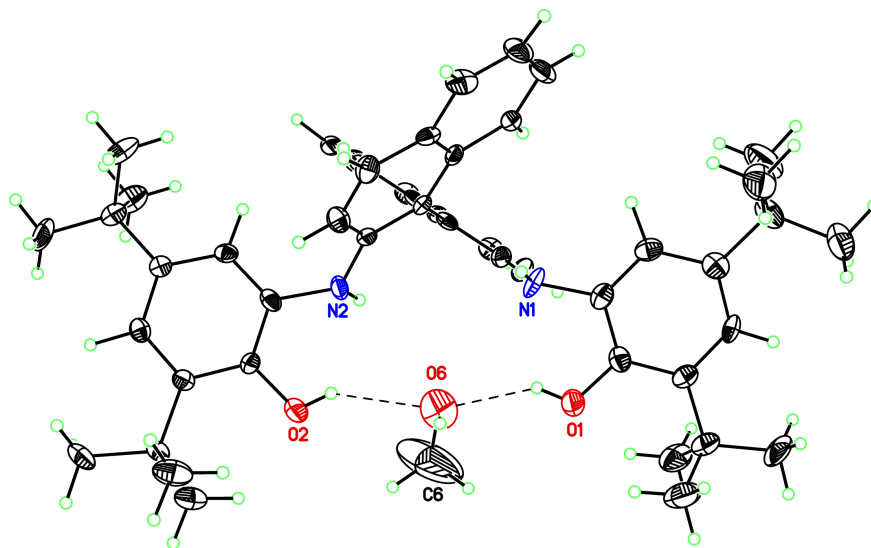

**Figure S2.** Thermal ellipsoid plot of (*R,R*)-2,3-C<sub>4</sub>H<sub>8</sub>(O<sub>2</sub>CC<sub>6</sub>H<sub>4</sub>-2-NH<sub>2</sub>)<sub>2</sub>.

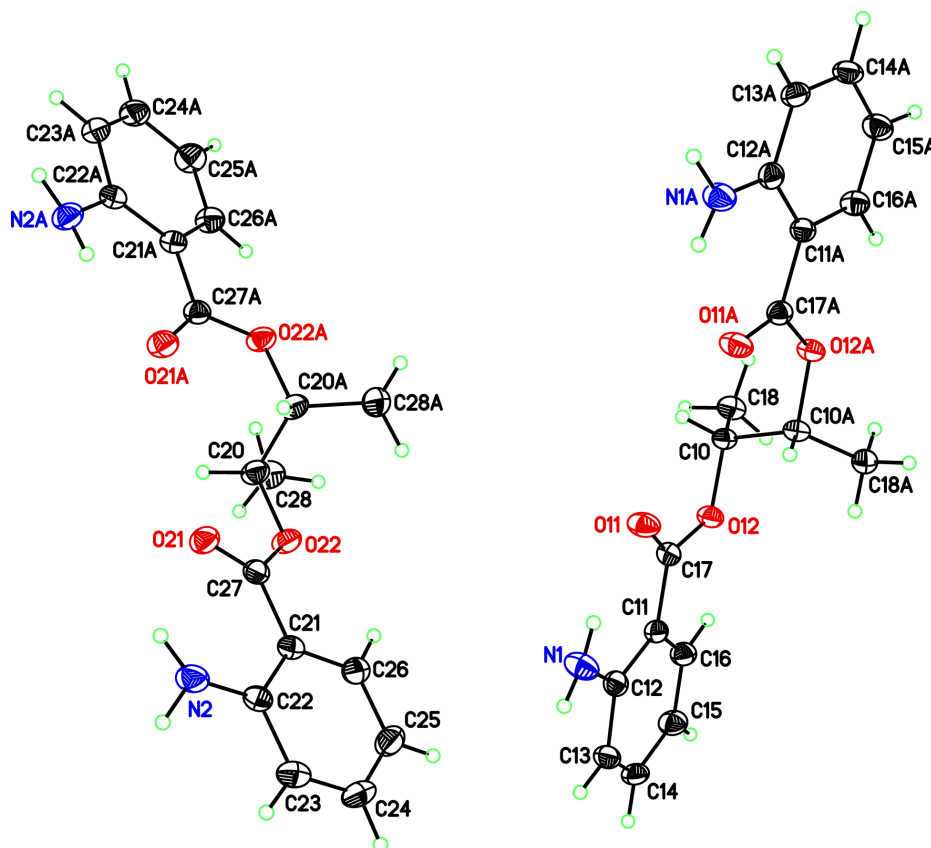



**Figure S3.** Thermal ellipsoid plot of second crystallographically unique palladium complex in  $(C,R,R)$ -(Bdan)Pd  $\cdot$  0.25 CH<sub>3</sub>OH. Hydrogen atoms are omitted for clarity.

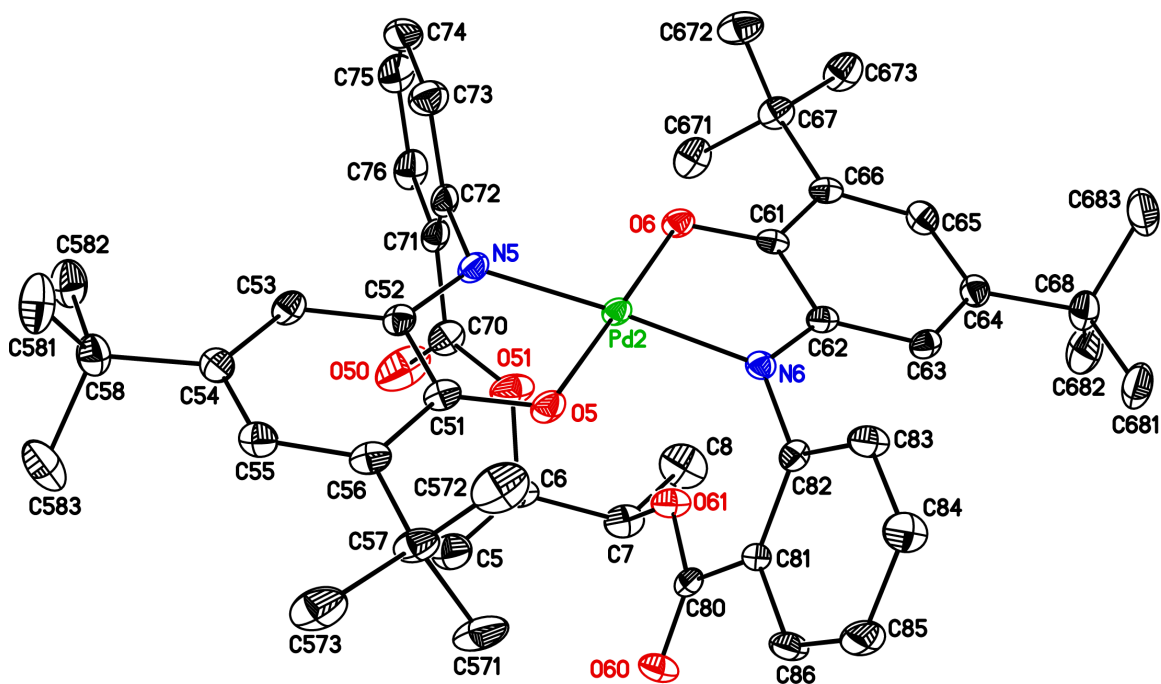

**Figure S4.** Thermal ellipsoid plot of second crystallographically unique osmium complex in  $(C,R,R)$ -(Bdan)OsO  $\cdot$  CH<sub>3</sub>OH. Hydrogen atoms are omitted for clarity.

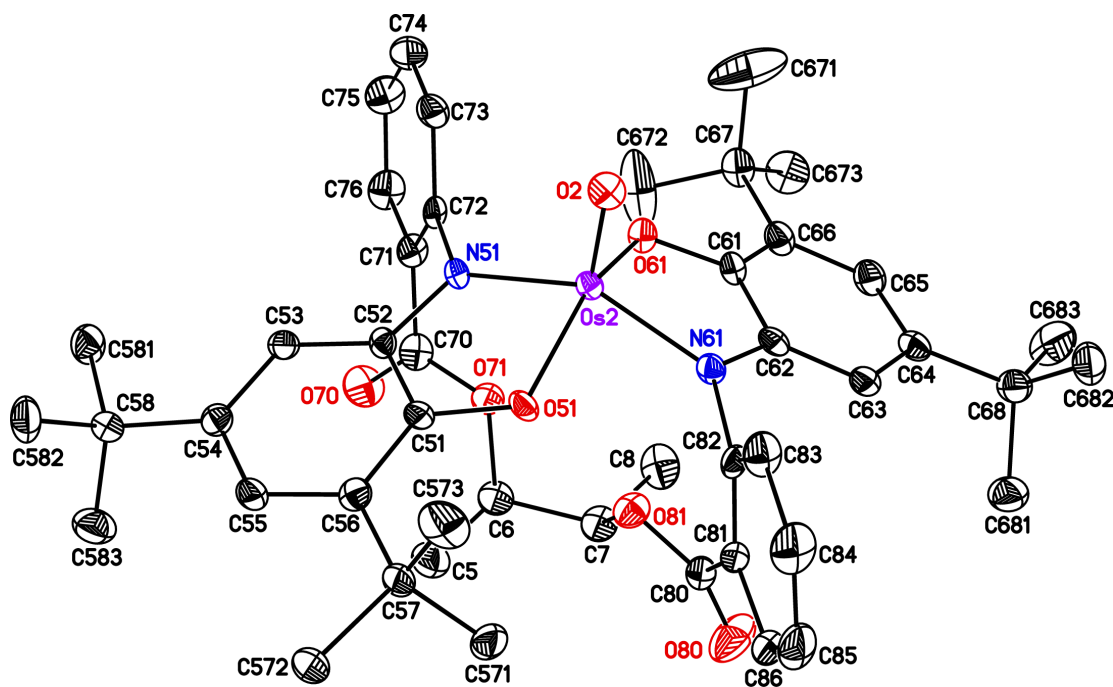

**Figure S5.** Thermal ellipsoid plot of molecule of  $(C,R,R)$ -(Bdan)OsO in  $(C,R,R)$ -(Bdan)OsO •  $(A,R,R)$ -(Bdan)OsO. Hydrogen atoms omitted for clarity.

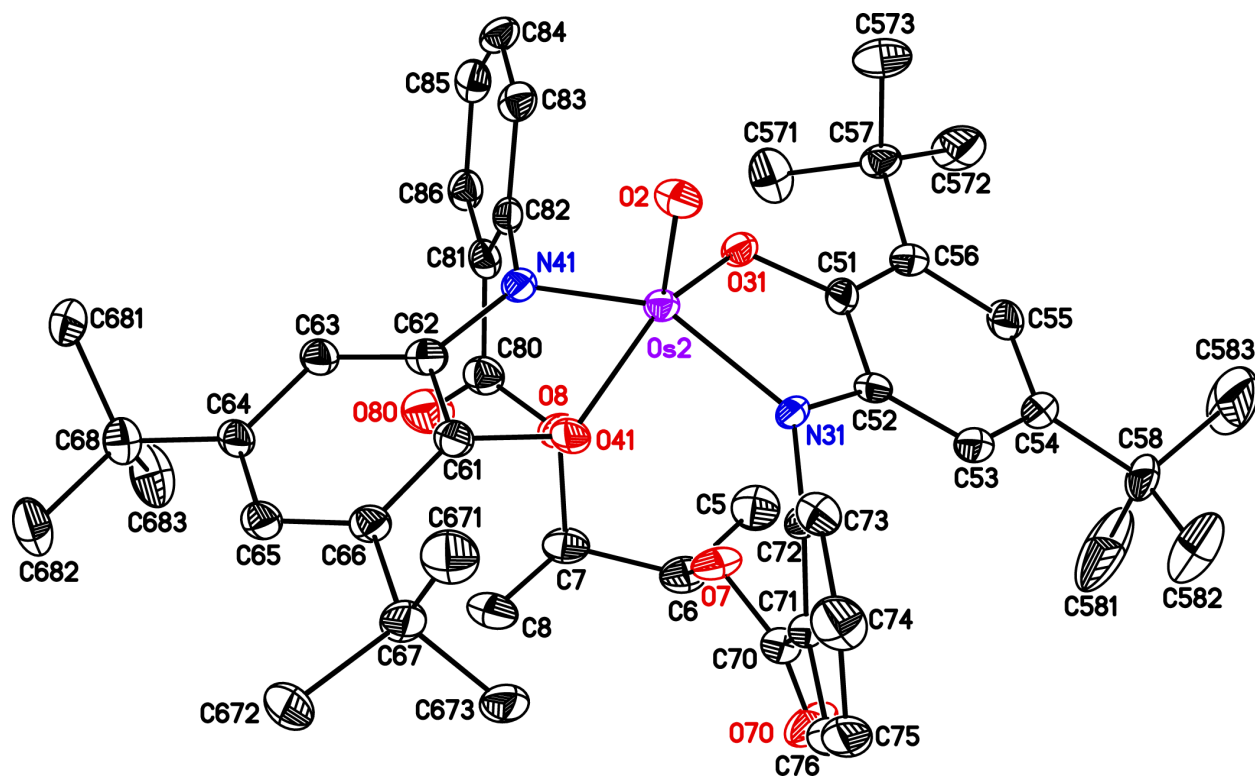

## II. $^1\text{H}$ NMR spectra

**Figure S6.**  $^1\text{H}$  NMR spectrum of (*R*)-BiniqH<sub>4</sub> (C<sub>6</sub>D<sub>6</sub>, 500 MHz).

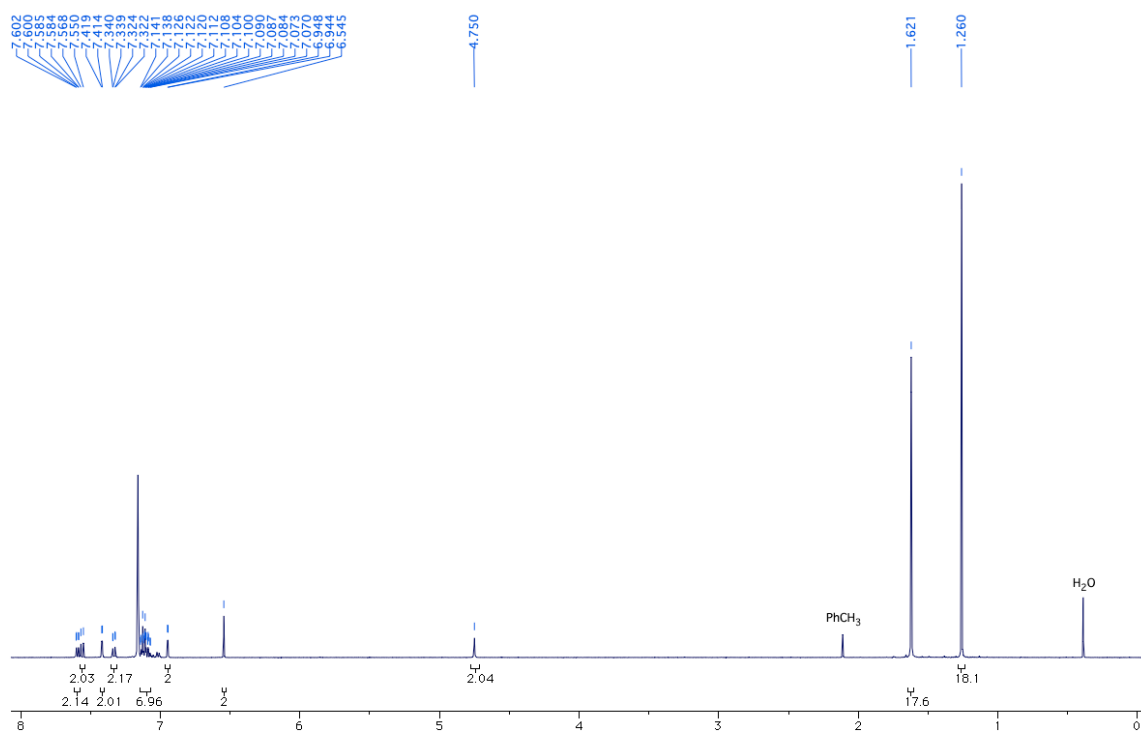

**Figure S7.**  $^1\text{H}$  NMR spectrum of  $(R,R)\text{-}2,3\text{-C}_4\text{H}_8(\text{O}_2\text{CC}_6\text{H}_4\text{-}2\text{-NH}_2)_2$  ( $\text{CDCl}_3$ , 400 MHz)

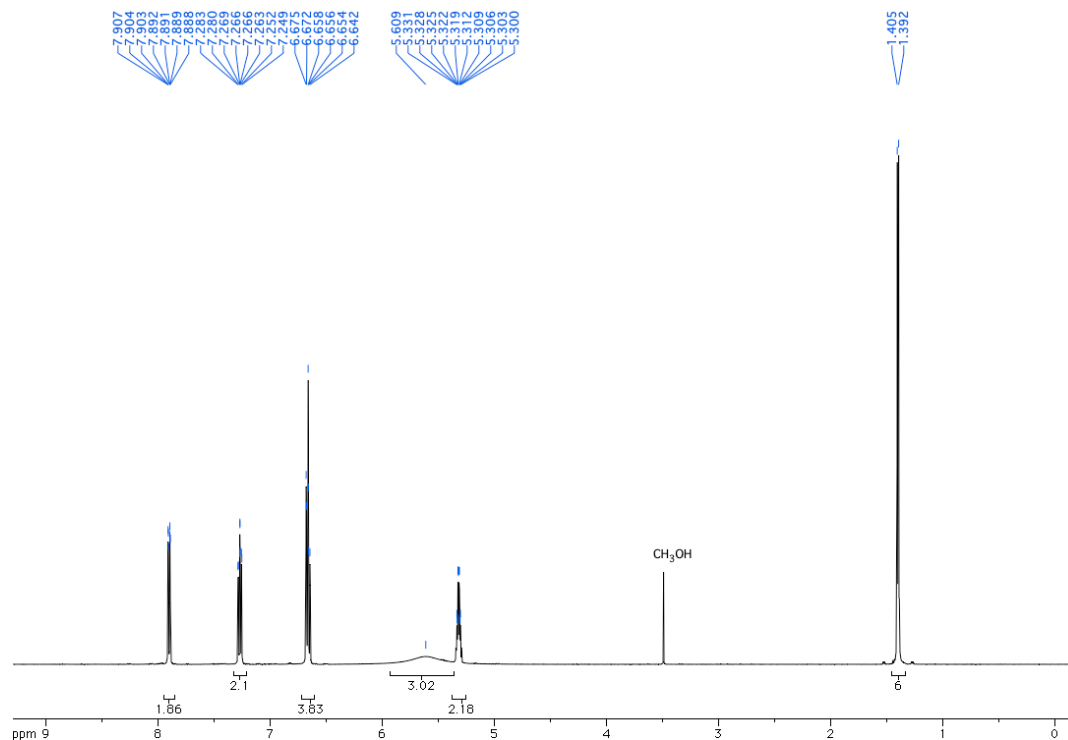

**Figure S8.** Experimental (**black**, bottom) and simulated (**red**, top) aliphatic  $^1\text{H}$  NMR signals for  $(R,R)\text{-}2,3\text{-C}_4\text{H}_8(\text{O}_2\text{CC}_6\text{H}_4\text{-}2\text{-NH}_2)_2$ . Simulation parameters for the  $A_3BB'A'_3$  spin system: linewidth = 1.0 Hz,  $\delta_A = 1.4010$  ppm,  $\delta_B = 5.3177$  ppm,  $J_{AB} = 6.5$  Hz,  $J_{BB'} = 4.6$  Hz.

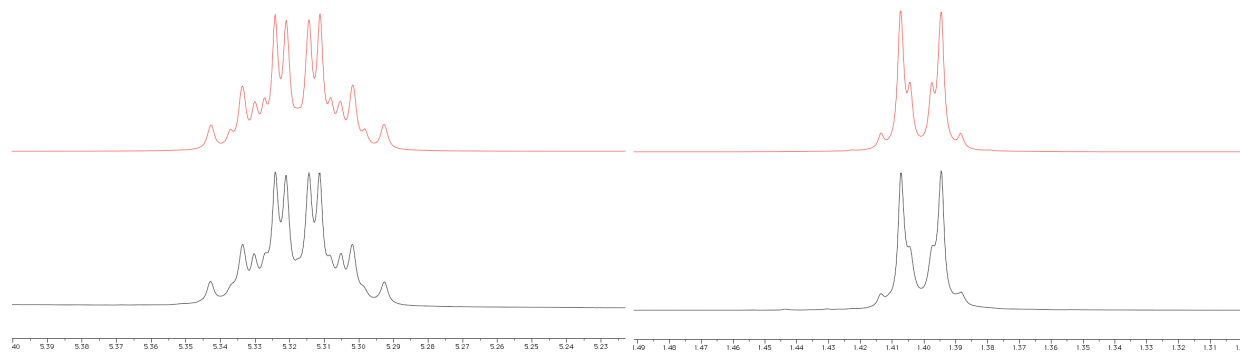

**Figure S9.**  $^1\text{H}$  NMR spectrum of (*R,R*)-BdanH<sub>4</sub> (CDCl<sub>3</sub>, 400 MHz)

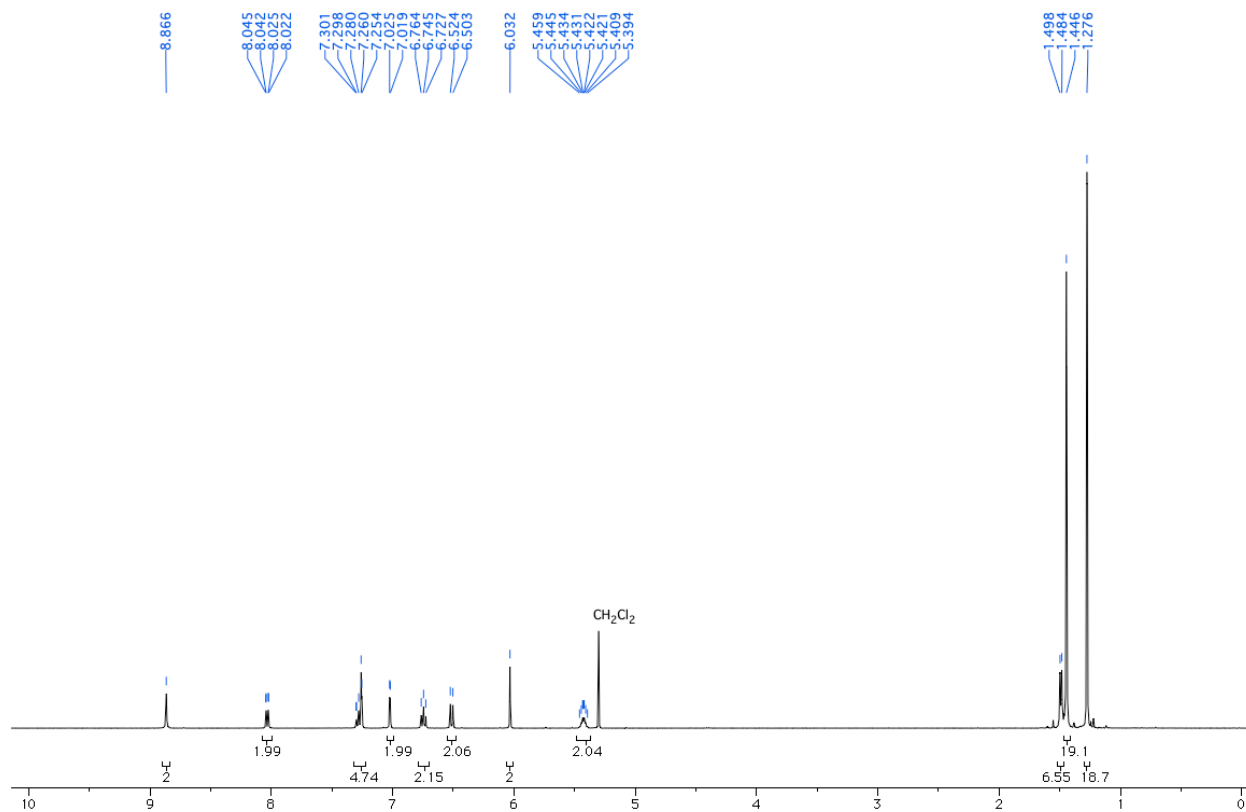

**Figure S10.** Experimental (**black**, bottom) and simulated (**red**, top) aliphatic  $^1\text{H}$  NMR signals for (*R,R*)-BdanH<sub>4</sub>. Simulation parameters for the  $A_3BB'A'_3$  spin system: linewidth = 2.0 Hz,  $\delta_A = 1.4910$  ppm,  $\delta_B = 5.4267$  ppm,  $J_{AB} = 6.4$  Hz,  $J_{BB'} = 5.2$  Hz.

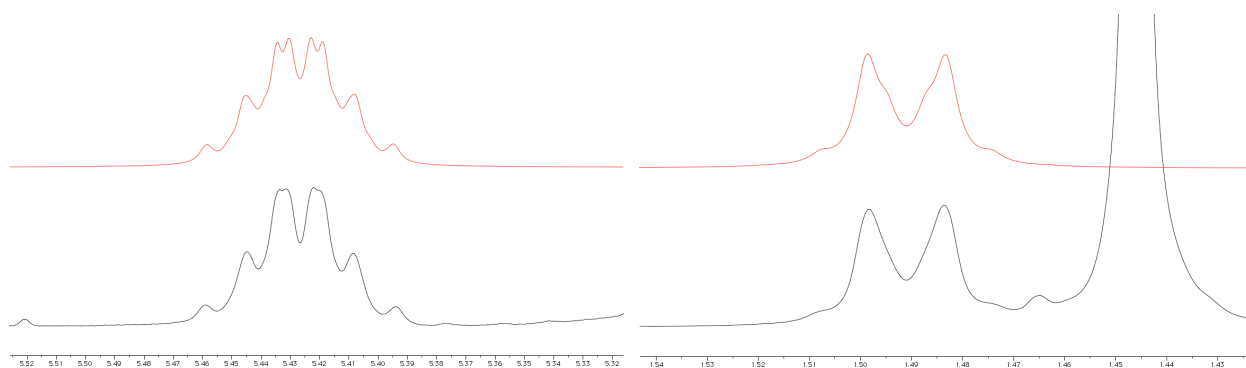

**Figure S11.**  $^1\text{H}$  NMR spectrum of (*R*)-(Biniq)Pd ( $\text{CDCl}_3$ , 500 MHz). The peak at  $\delta$  1.6 ppm is due to  $\text{H}_2\text{O}$ .

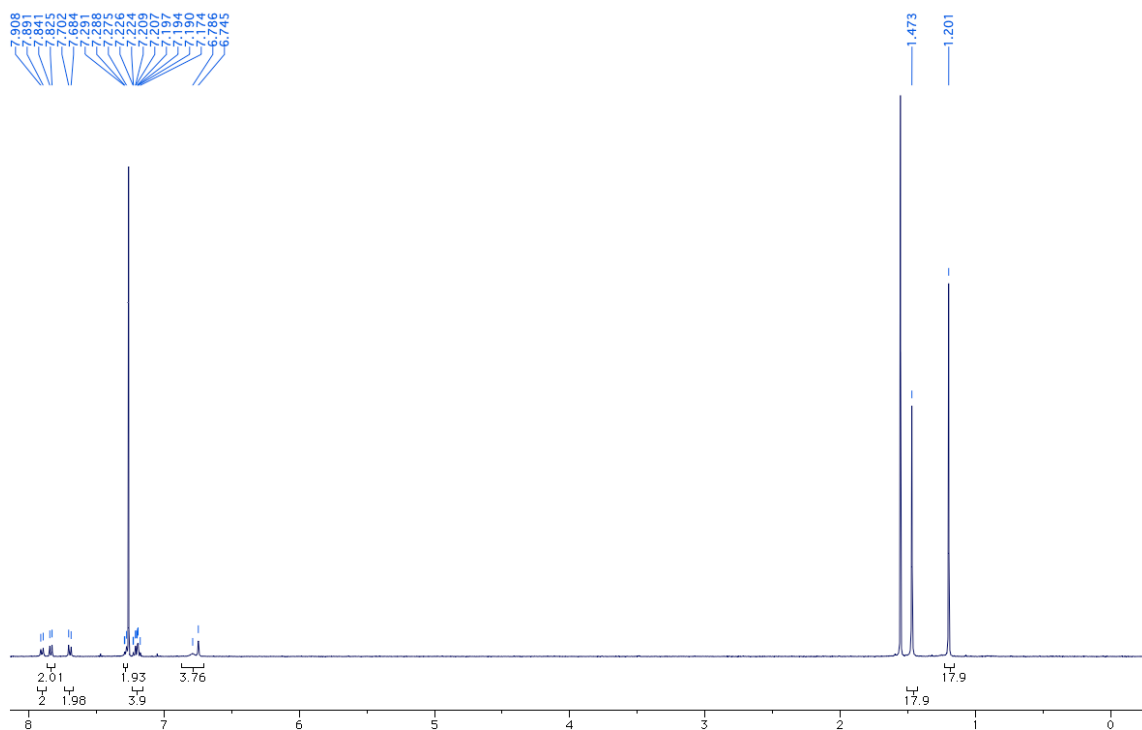

**Figure S12.**  $^1\text{H}$  NMR spectrum of (*R*)-(Biniq)Pt ( $\text{C}_6\text{D}_6$ , 500 MHz). The peak at  $\delta$  0.4 ppm is due to  $\text{H}_2\text{O}$ .

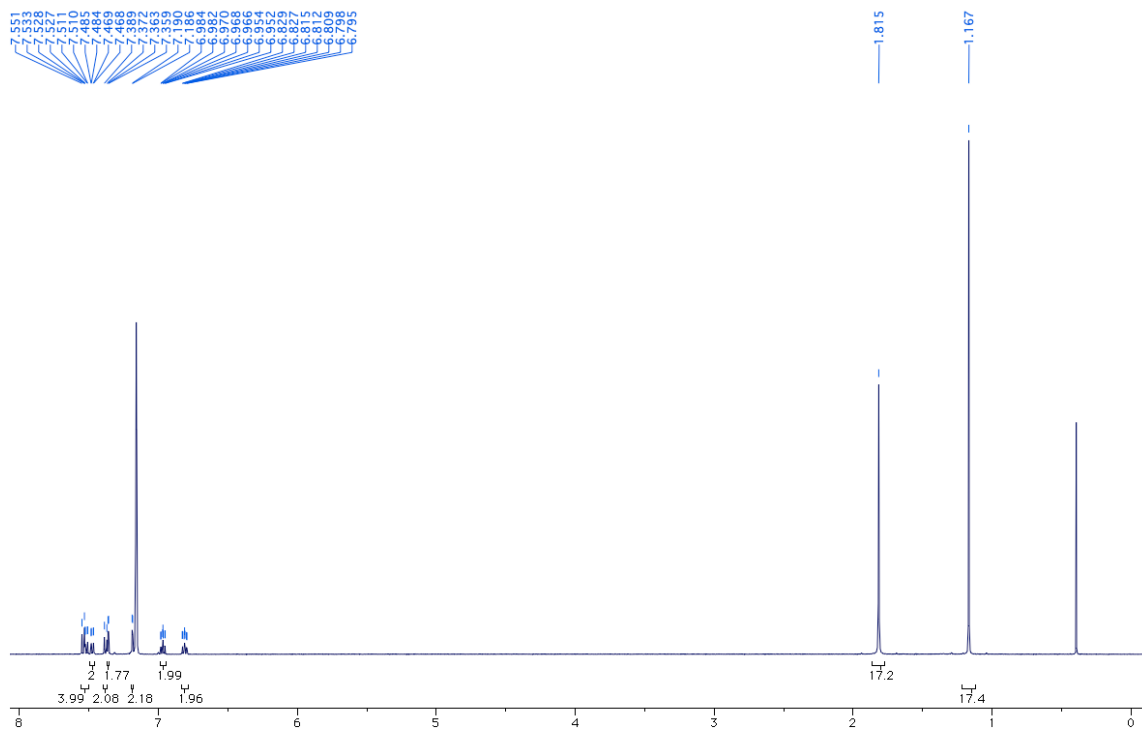

**Figure S13.**  $^1\text{H}$  NMR spectrum of  $(C,R,R)$ -(Bdan)Pd ( $\text{CDCl}_3$ , 500 MHz)

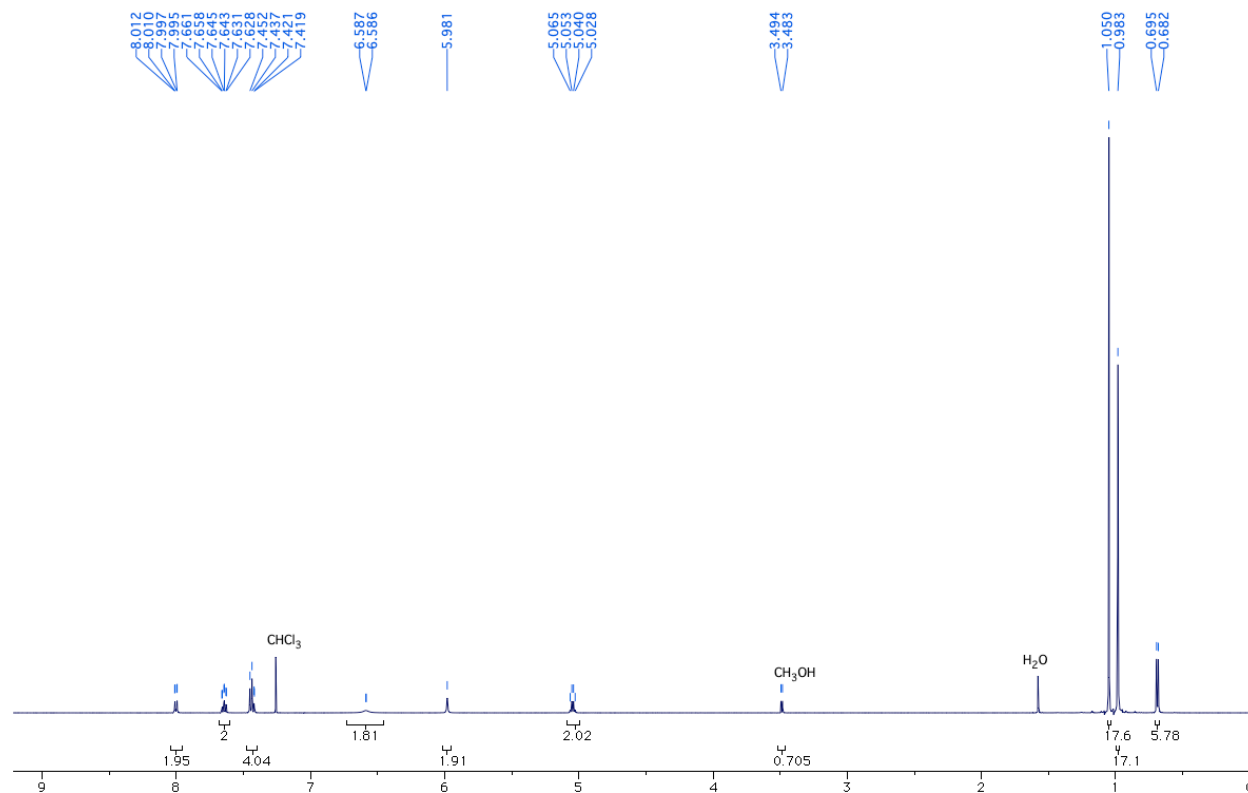

**Figure S14.** Experimental (**black**, bottom) and simulated (**red**, top) aliphatic  $^1\text{H}$  NMR signals for  $(C,R,R)$ -(Bdan)Pd. Simulation parameters for the  $A_3BB'A'_3$  spin system: linewidth = 1.2 Hz,  $\delta_A = 0.6883$  ppm,  $\delta_B = 5.0463$  ppm,  $J_{AB} = 6.5$  Hz,  $J_{BB'} = 1.2$  Hz.

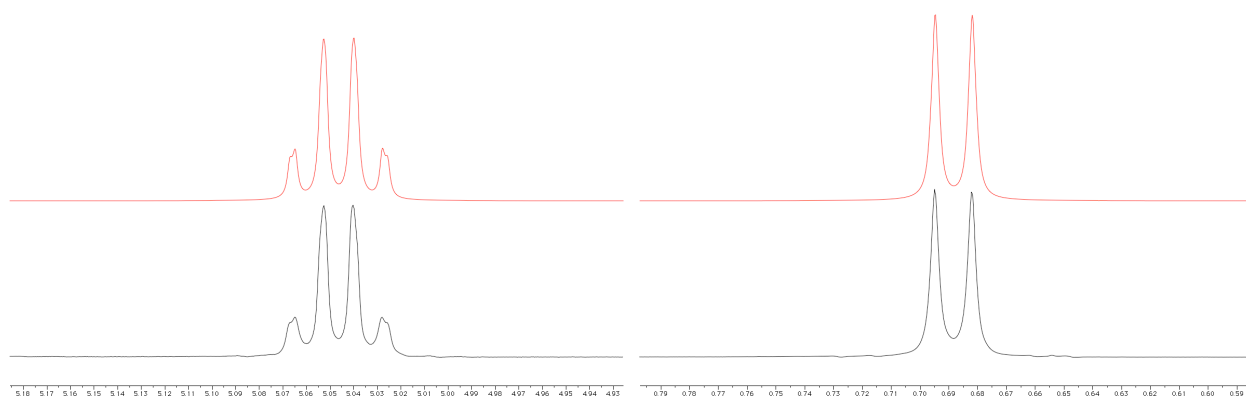

**Figure S15.**  $^1\text{H}$  NMR spectrum of  $(C,R,R)$ -(Bdan)OsO ( $\text{CD}_2\text{Cl}_2$ , 500 MHz)

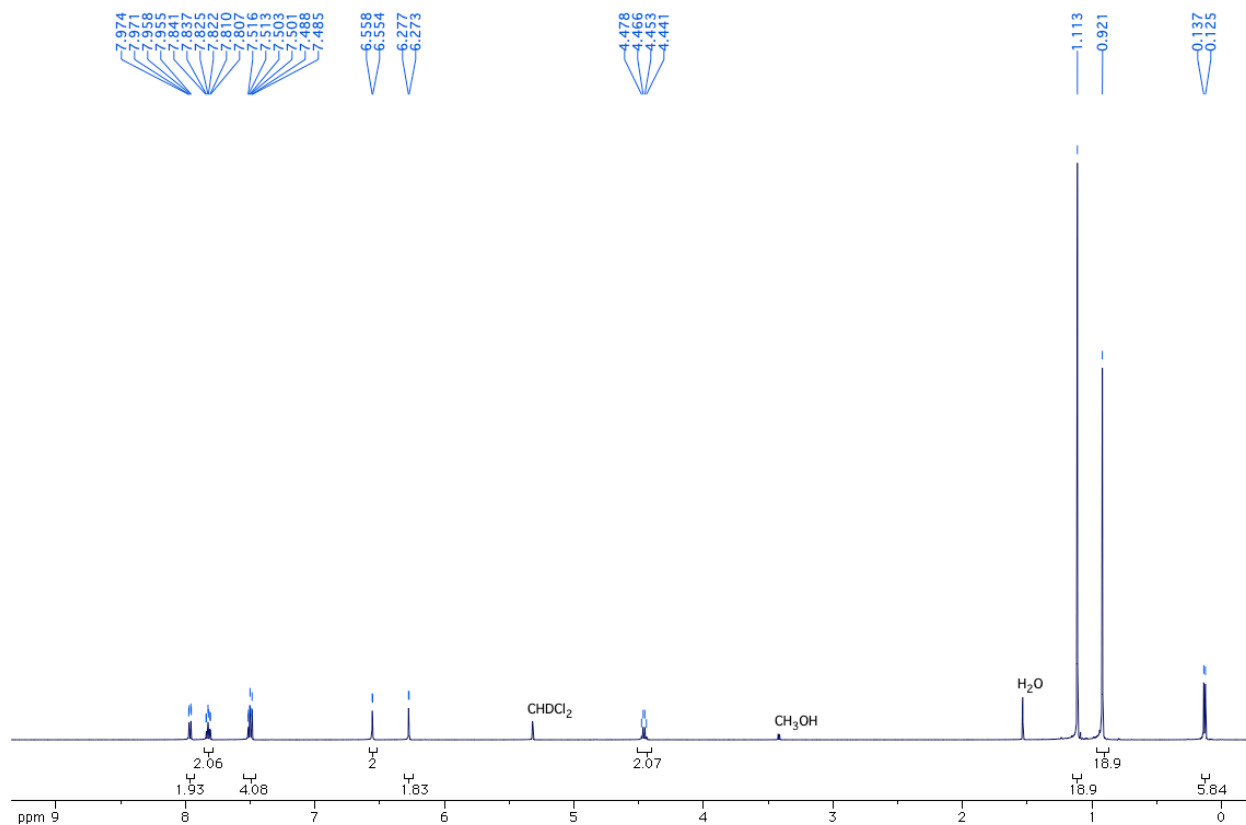

**Figure S16.** Experimental (**black**, bottom) and simulated (**red**, top) aliphatic  $^1\text{H}$  NMR signals for  $(C,R,R)$ -(Bdan)OsO. Simulation parameters for the  $A_3BB'A'_3$  spin system: linewidth = 1.26 Hz,  $\delta_A = 0.1310$  ppm,  $\delta_B = 4.4595$  ppm,  $J_{AB} = 6.5$  Hz,  $J_{BB'} = 1.2$  Hz.

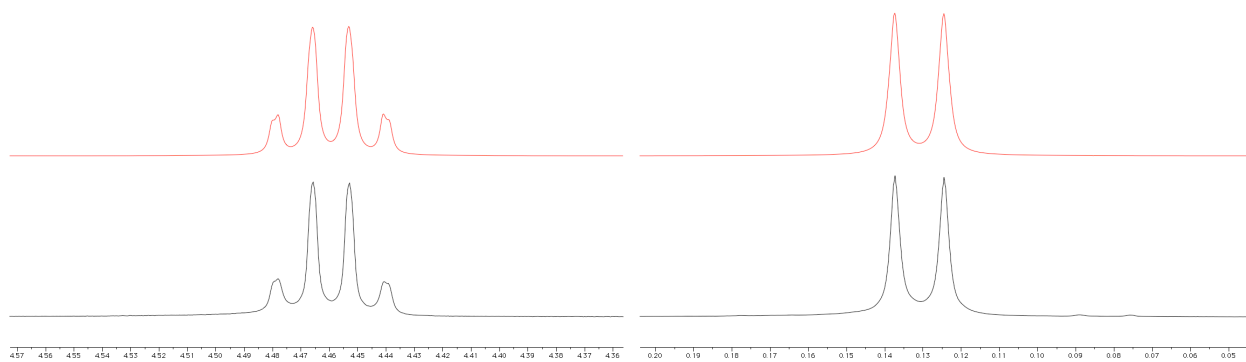



**Figure S17.** Experimental (**black**, bottom) and simulated (**red**, top) aliphatic  $^1\text{H}$  NMR signals for (Egan)OsO ( $\text{CDCl}_3$ , 400 MHz). Simulation parameters for the  $AA'BB'$  spin system:  $\delta_A = 2.796$  ppm,  $\delta_B = 4.314$  ppm,  $J_{AB} = -12.5$  Hz,  $J_{AB'} = 2.1$  Hz,  $J_{AA'} = 11.8$  Hz,  $J_{BB'} = 1.8$  Hz.

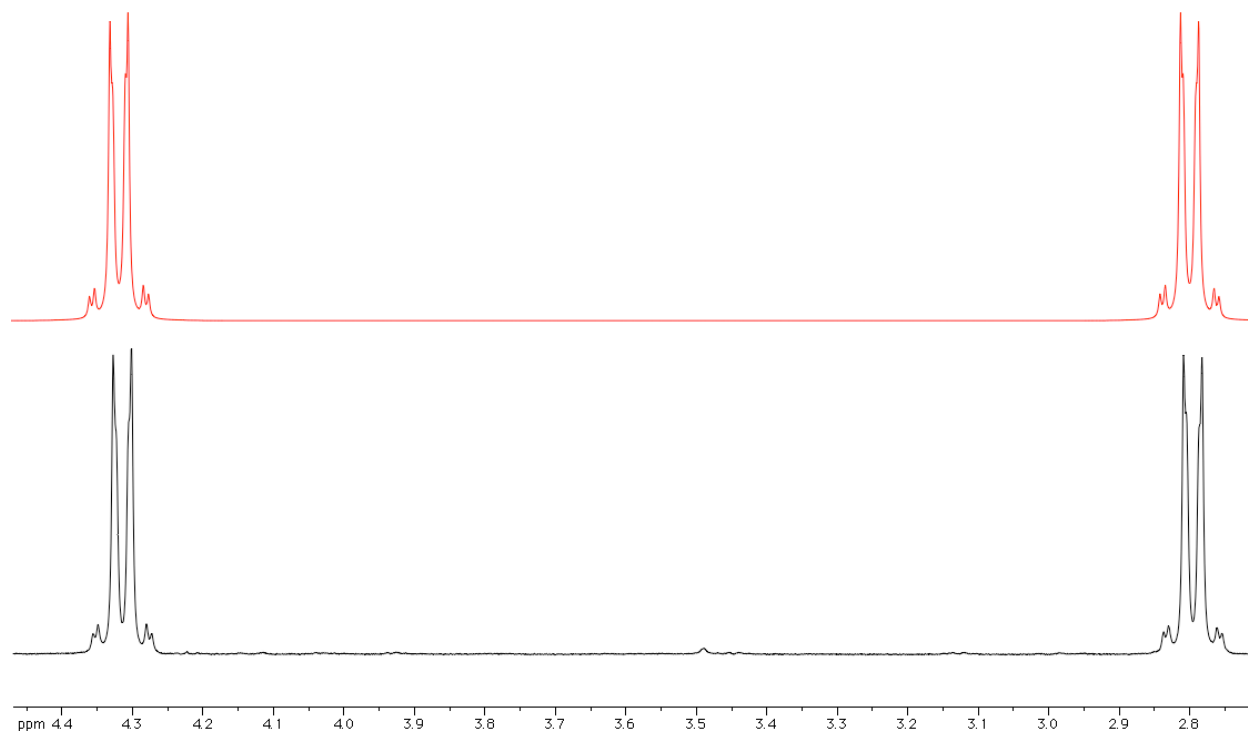

### III. $^{13}\text{C}\{^1\text{H}\}$ NMR spectra

**Figure S18.**  $^{13}\text{C}\{^1\text{H}\}$  NMR spectrum of (*R*)-BiniqH<sub>4</sub> (C<sub>6</sub>D<sub>6</sub>, 125.7 MHz)

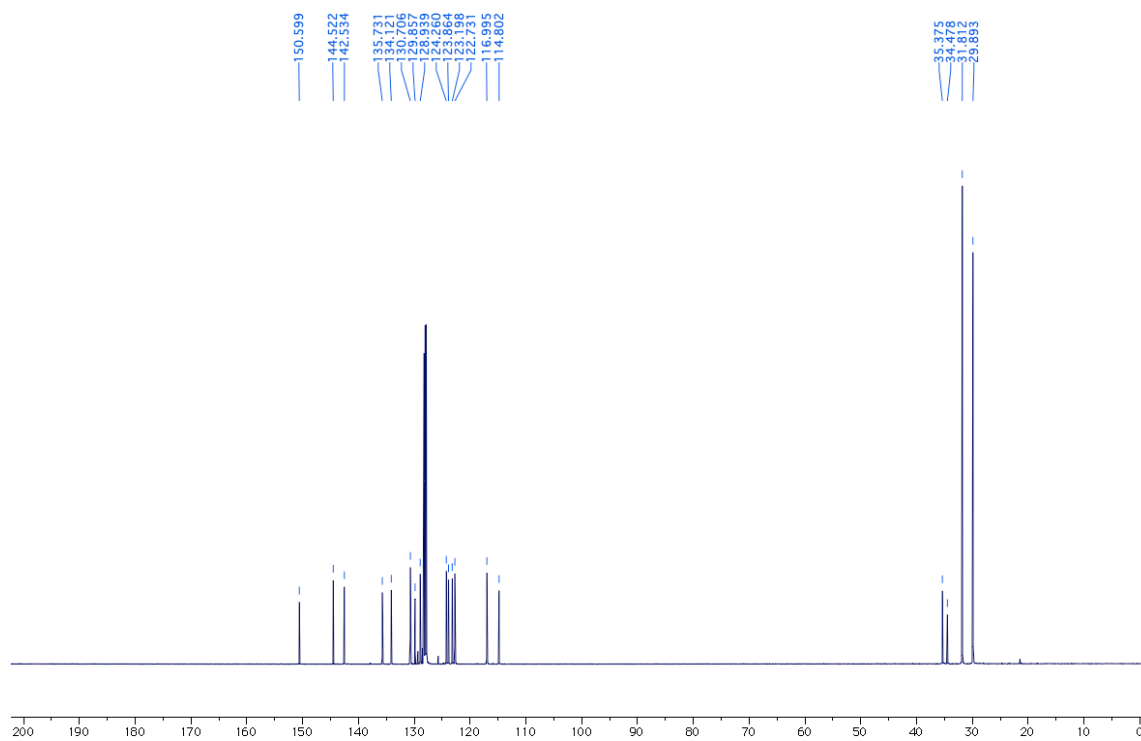

**Figure S19.**  $^{13}\text{C}\{^1\text{H}\}$  NMR spectrum of (*R,R*)-2,3-C<sub>4</sub>H<sub>8</sub>(O<sub>2</sub>CC<sub>6</sub>H<sub>4</sub>-2-NH<sub>2</sub>)<sub>2</sub> (CDCl<sub>3</sub>, 100.6 MHz)

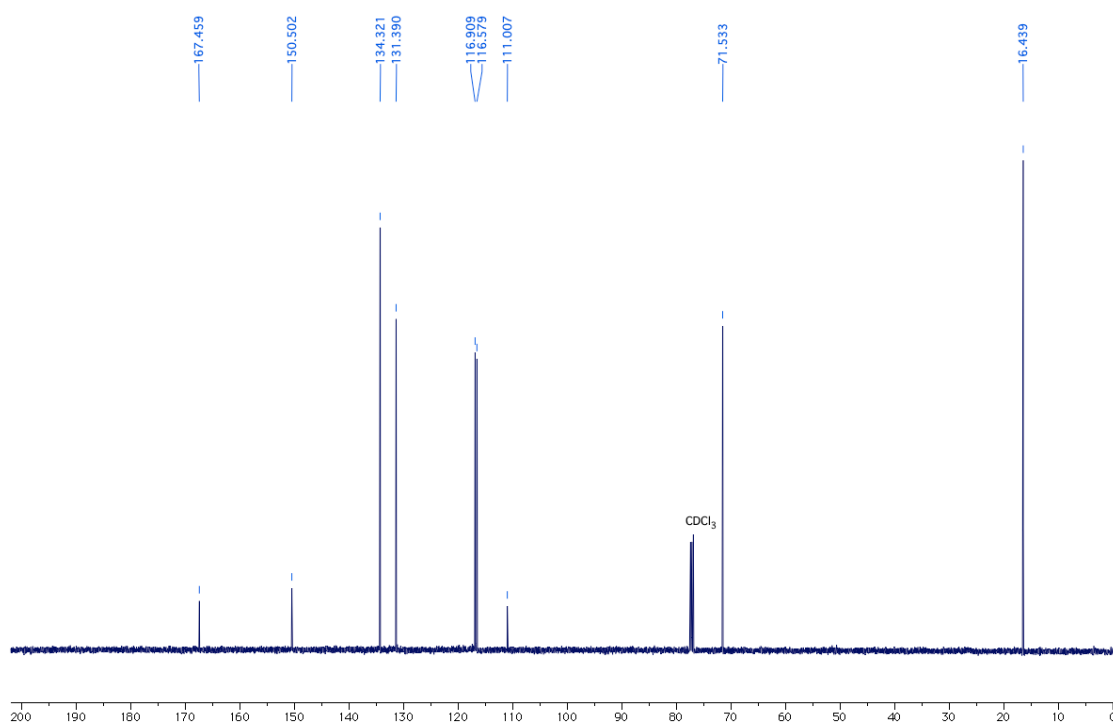

**Figure S20.**  $^{13}\text{C}\{^1\text{H}\}$  NMR spectrum of (*R,R*)-BdanH<sub>4</sub> (CDCl<sub>3</sub>, 100.6 MHz)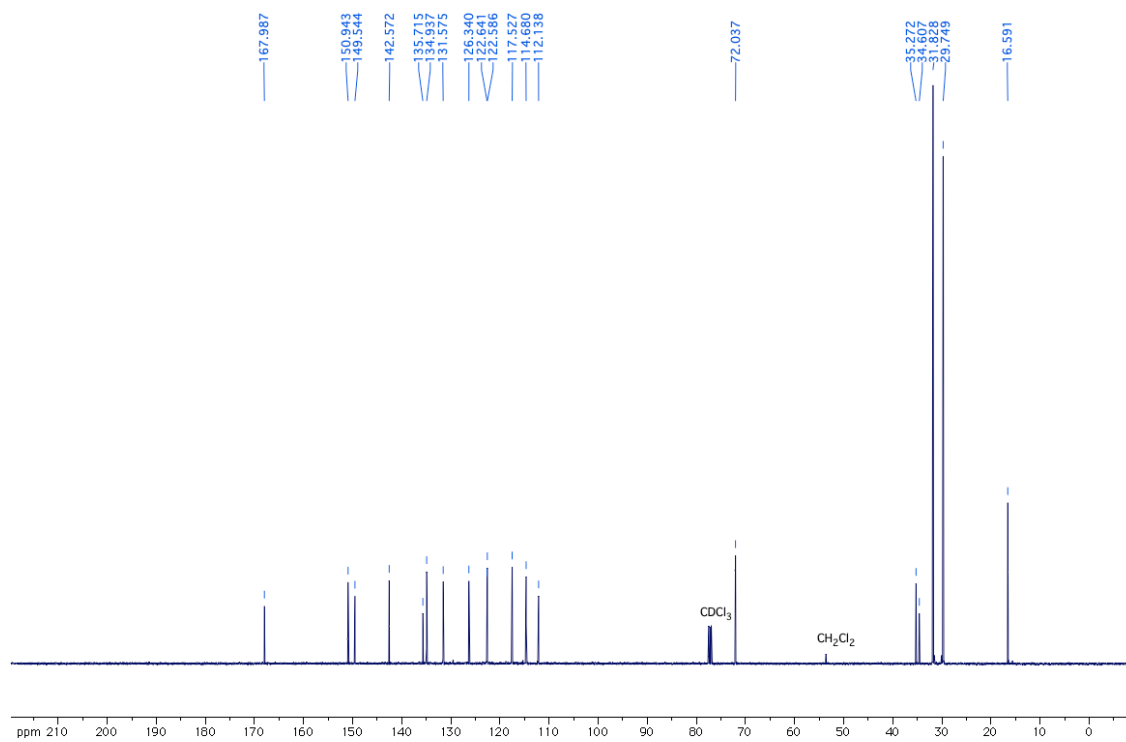**Figure S21.**  $^{13}\text{C}\{^1\text{H}\}$  NMR spectrum of (*R,R*)-(Biniq)Pd (CD<sub>2</sub>Cl<sub>2</sub>, 125.7 MHz)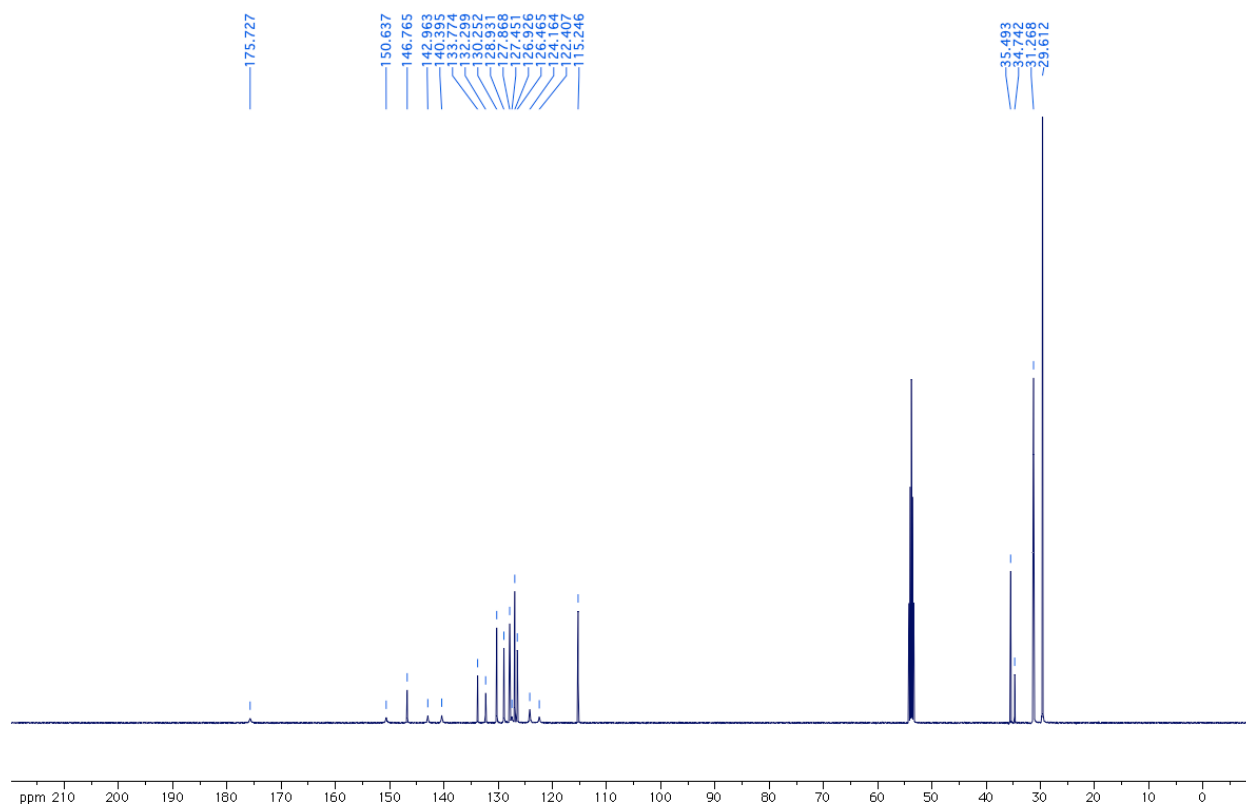

**Figure S22.**  $^{13}\text{C}\{^1\text{H}\}$  NMR spectrum of (*R,R*)-(Biniq)Pt ( $\text{C}_6\text{D}_6$ , 125.7 MHz)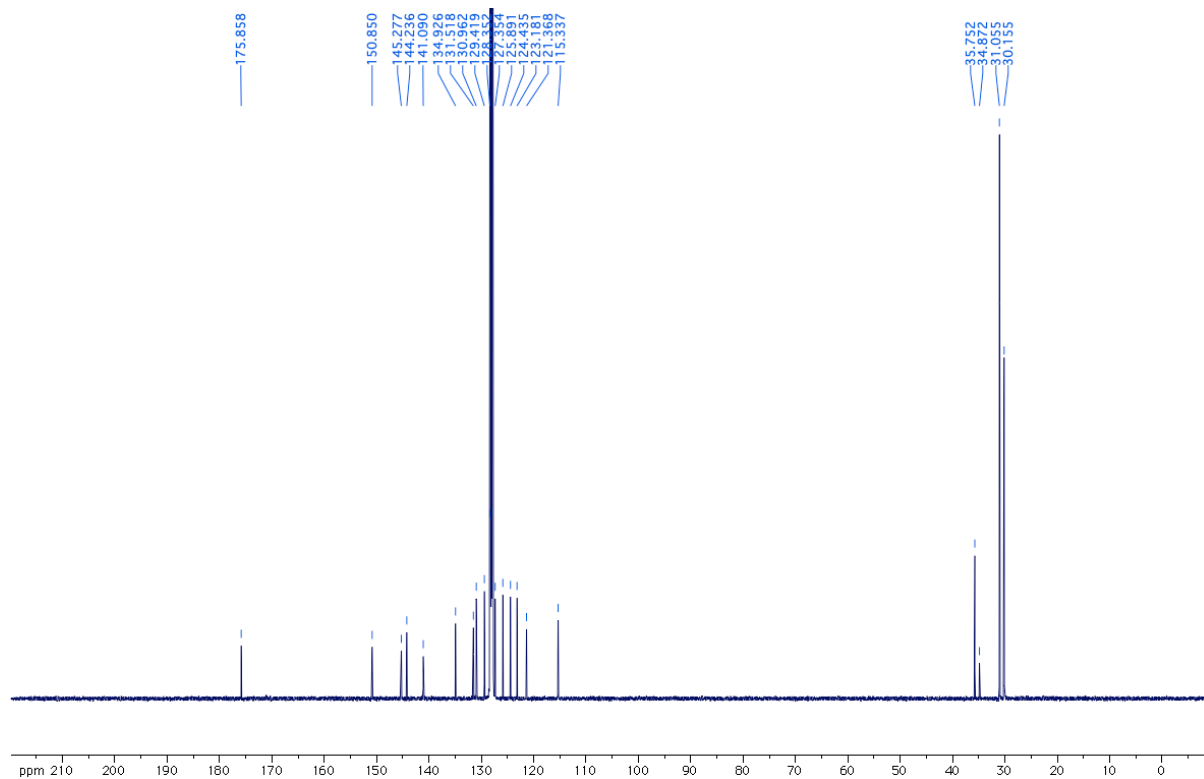**Figure S23.**  $^{13}\text{C}\{^1\text{H}\}$  NMR spectrum of (*C,R,R*)-(Bdan)Pd ( $\text{CDCl}_3$ , 125.7 MHz)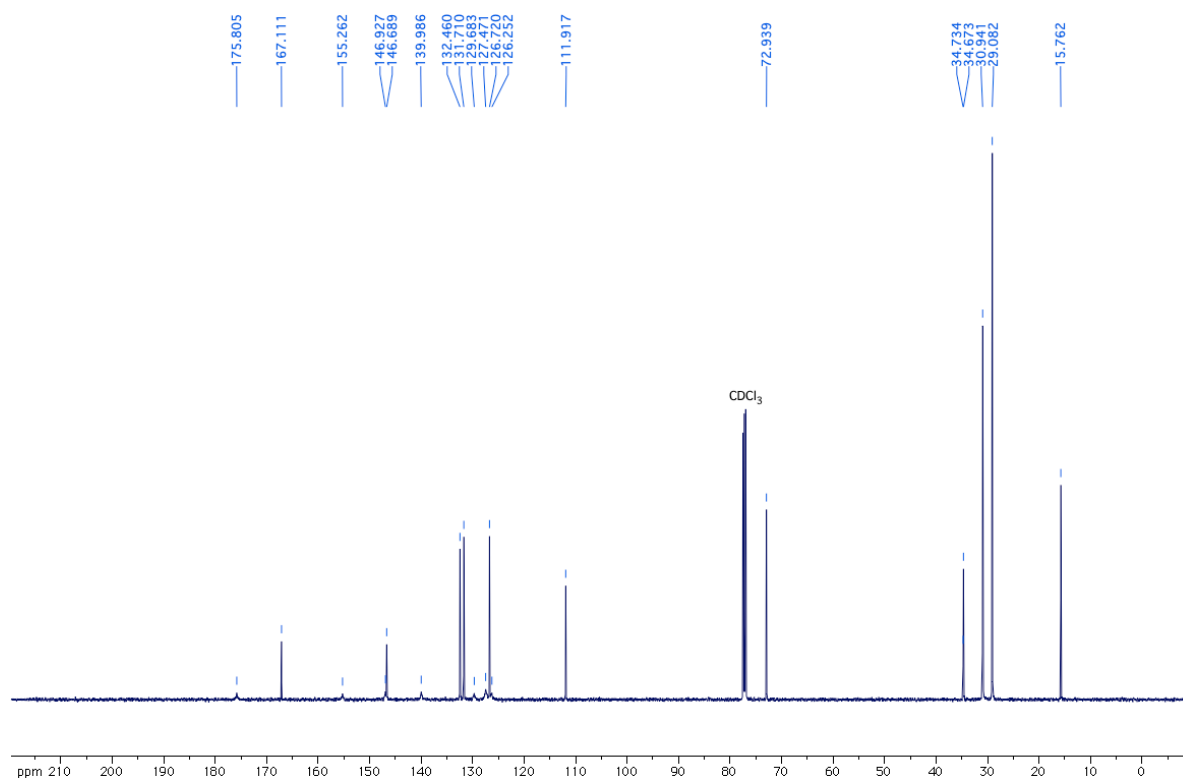

**Figure S24.**  $^{13}\text{C}\{^1\text{H}\}$  NMR spectrum of  $(C,R,R)$ -(Bdan)OsO ( $\text{CD}_2\text{Cl}_2$ , 125.7 MHz)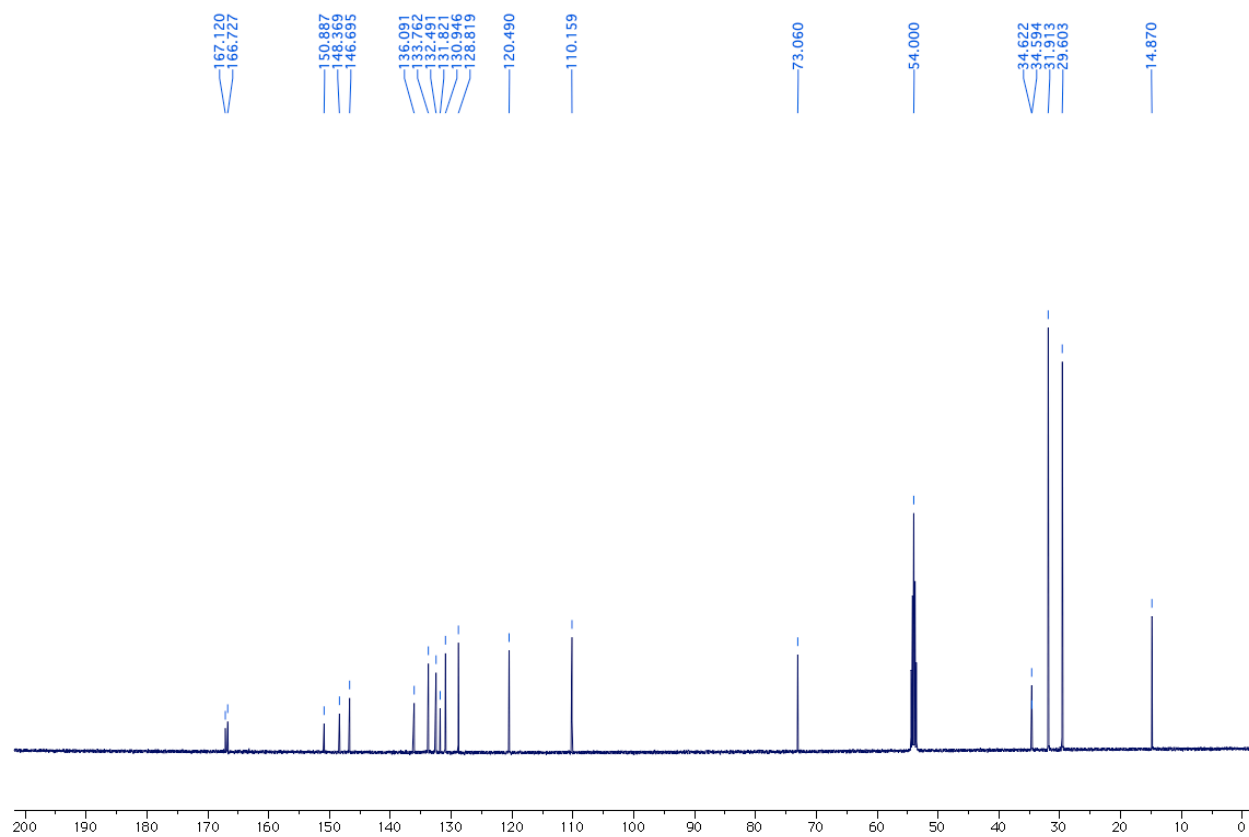

#### IV. IR spectra

**Figure S25.** IR spectrum of (*R*)-BiniqH<sub>4</sub> (evapd film)

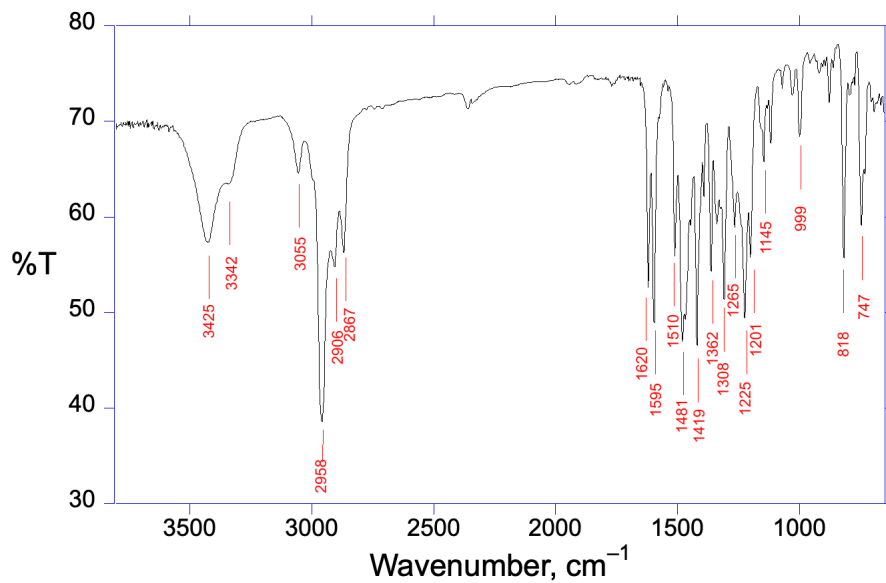

**Figure S26.** IR spectrum of (*R,R*)-2,3-C<sub>4</sub>H<sub>8</sub>(O<sub>2</sub>CC<sub>6</sub>H<sub>4</sub>-2-NH<sub>2</sub>)<sub>2</sub> (ATR)

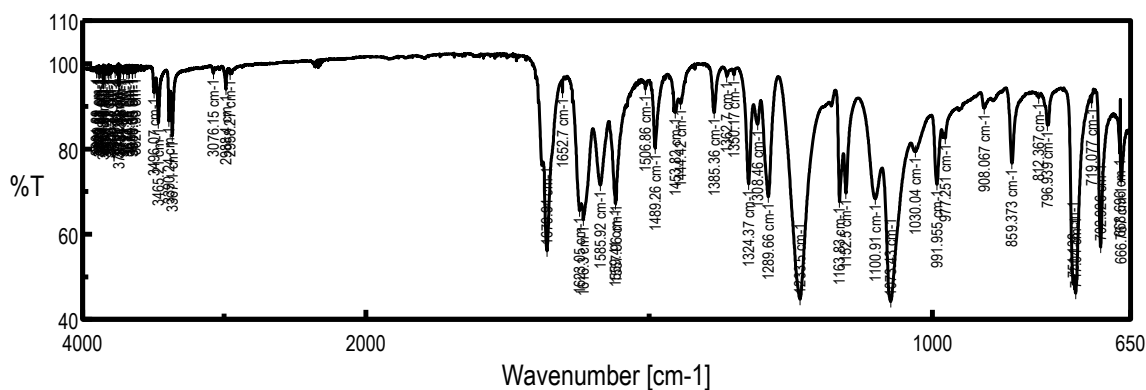

**Figure S27.** IR spectrum of (*R,R*)-BdanH<sub>4</sub> (ATR)

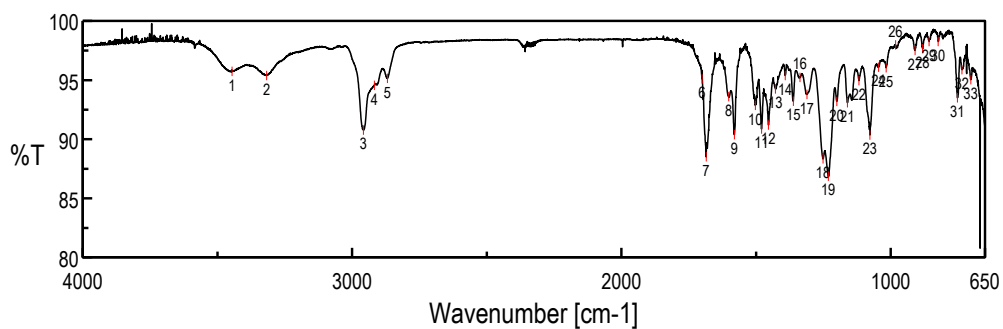

**Figure S28.** IR spectrum of (*R*)-(Biniq)Pd (evapd film)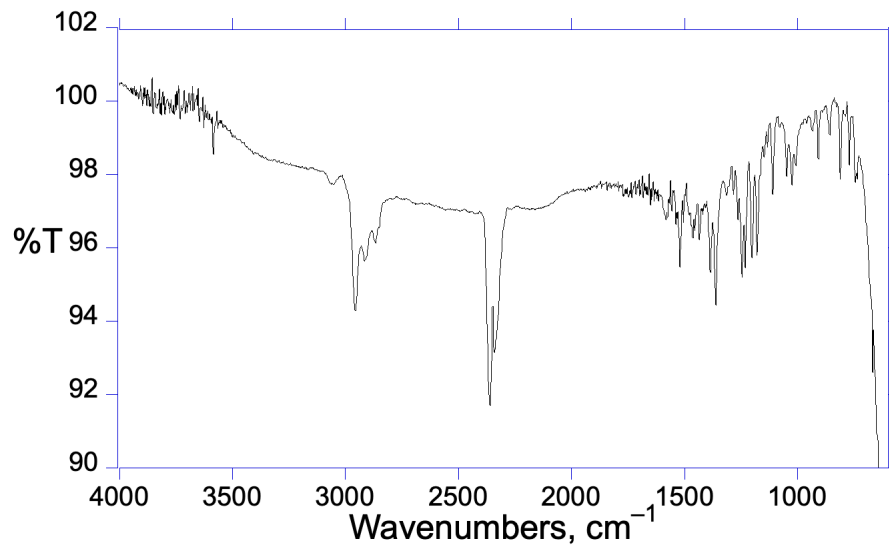**Figure S29.** IR spectrum of (*R*)-(Biniq)Pt (evapd film)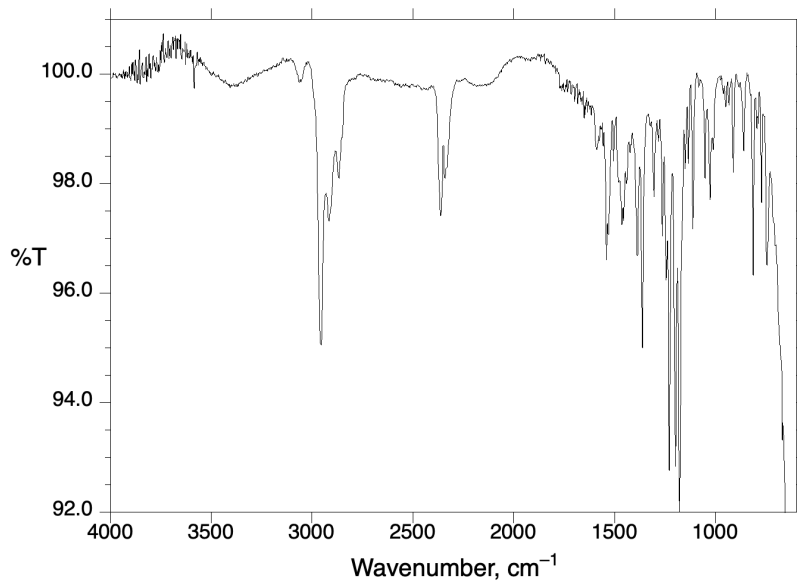

**Figure S30.** IR spectrum of (*C,R,R*)-(Bdan)Pd (evapd film)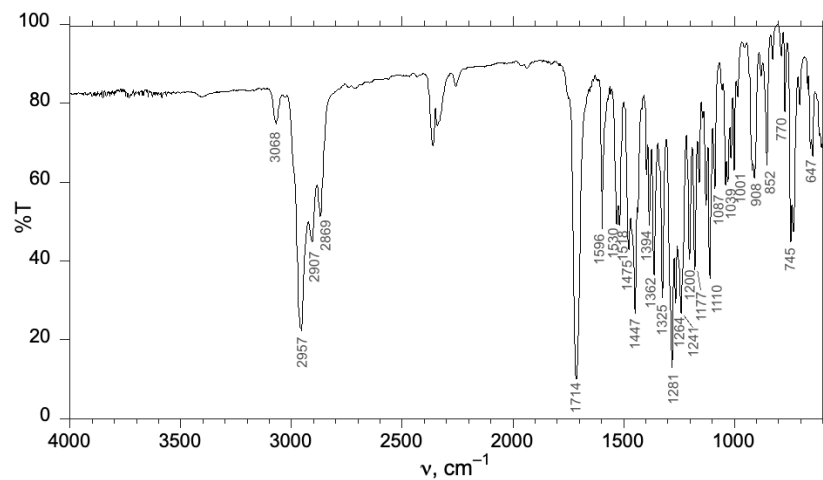**Figure S31.** IR spectrum of (*C,R,R*)-(Bdan)OsO (evapd film)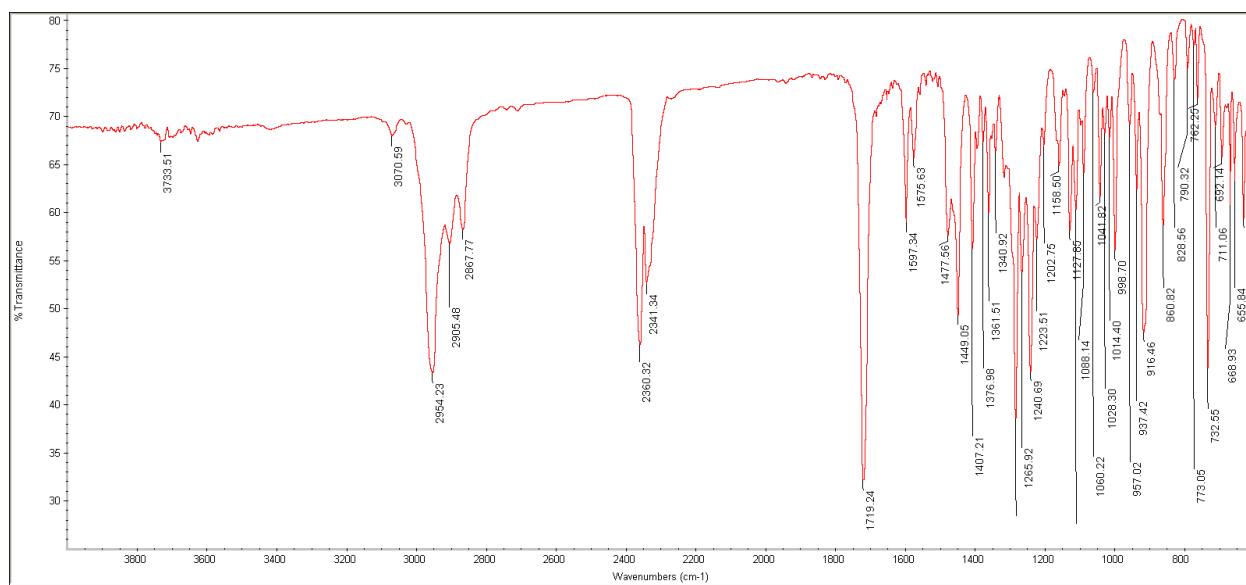



## V. Electrochemistry

**Figure S32.** CV of  $(C,R,R)$ -(Bdan)Pd ( $\text{CH}_2\text{Cl}_2$ ,  $50 \text{ mV s}^{-1}$ ,  $0.1 \text{ M Bu}_4\text{NPF}_6$ ).

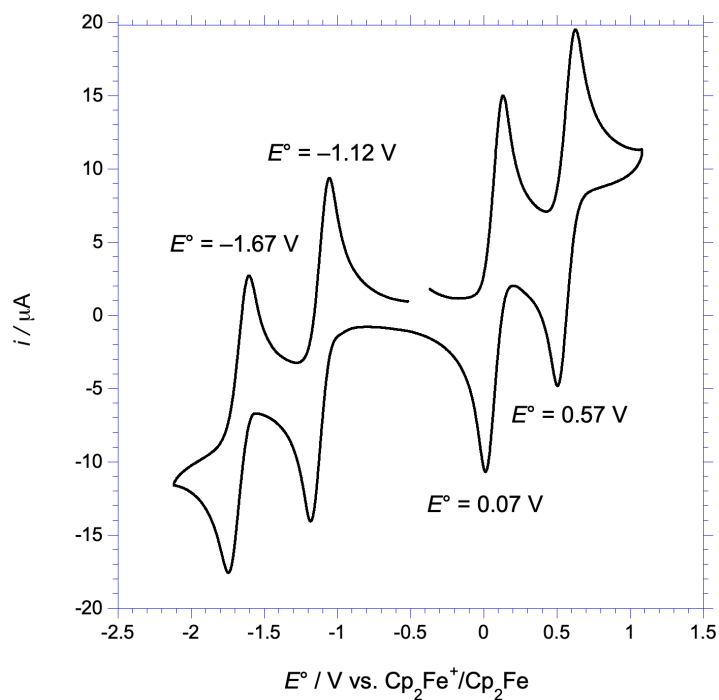

**Figure S33.** CV of  $(R)$ -(Biniq)Pd ( $\text{CH}_2\text{Cl}_2$ ,  $20 \text{ mV s}^{-1}$ ,  $0.1 \text{ M Bu}_4\text{NPF}_6$ ) at (a)  $1.0 \text{ mM}$  (Biniq)Pd (top, left) and (b)  $0.1 \text{ mM}$  (Biniq)Pd (bottom, right).

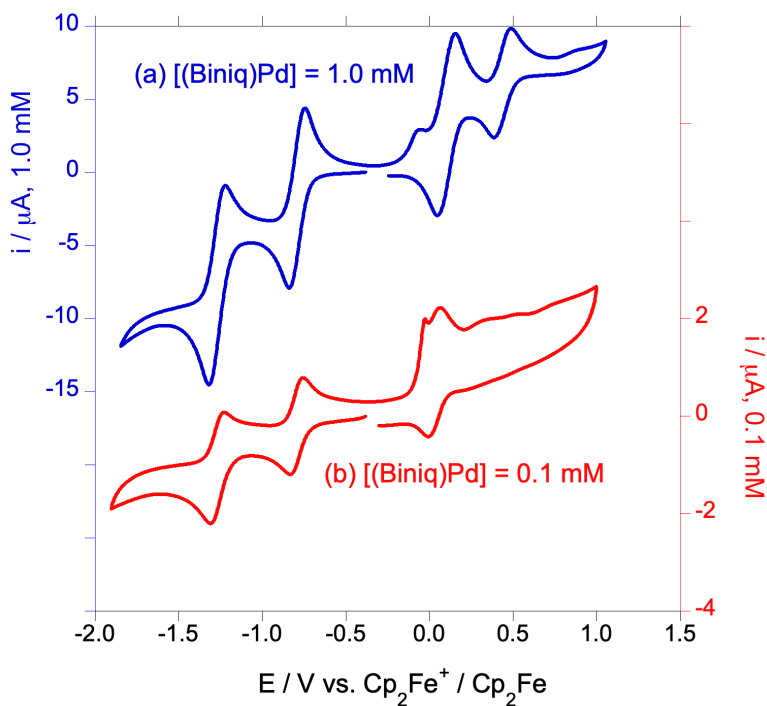

## VI. Variable-temperature NMR spectroscopy

**Figure S34.** Variable-temperature  $^1\text{H}$  NMR spectra (downfield region) of  $(C,R,R)$ -(Bdan)Pd ( $\text{CDCl}_2\text{CDCl}_2$ ). The signal at  $\delta$  6.0 is due to the solvent residual.

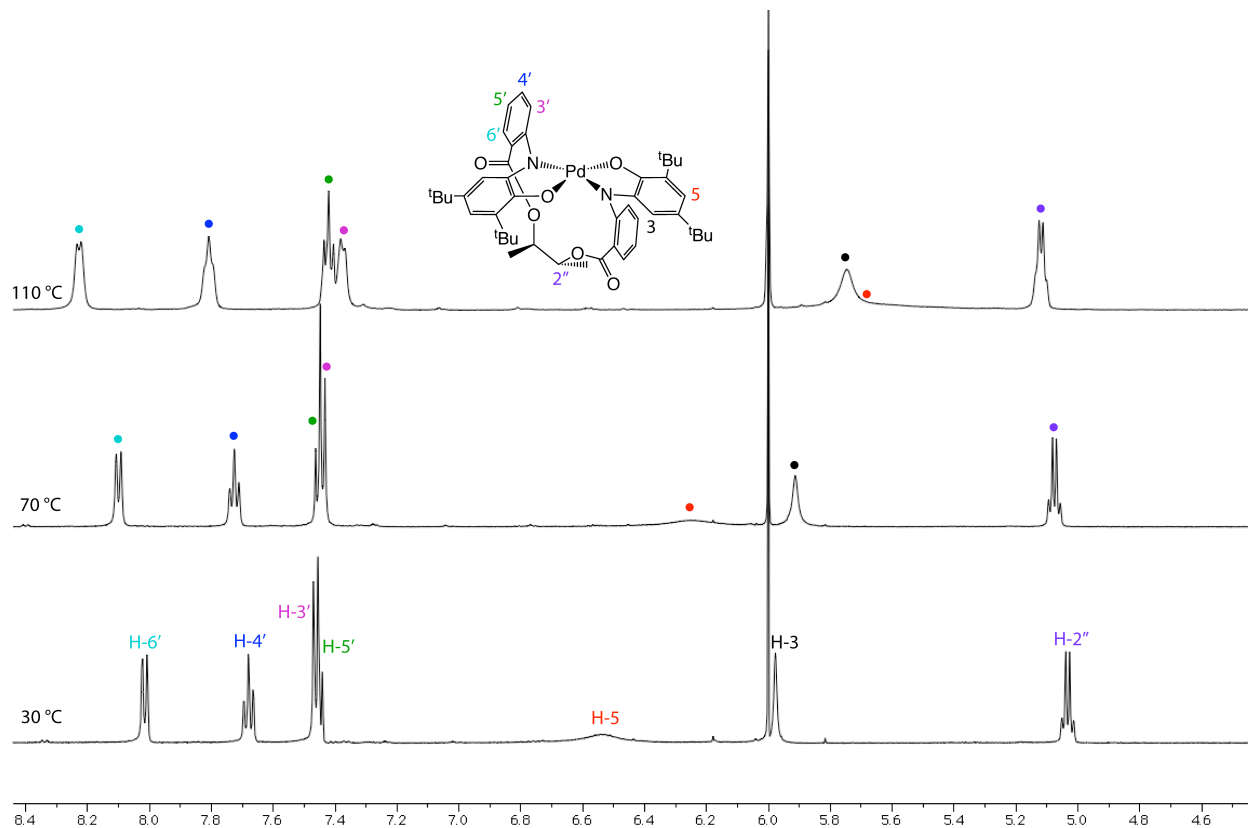

**Figure S35.** Temperature-dependence of  $^1\text{H}$  chemical shifts of  $(R)$ -(Biniq)Pd ( $\text{CDCl}_2\text{CDCl}_2$ ). Solid lines are fit to eq 1 with (a) a model with  $A_{\text{H-5}}$  constrained to be  $-4.26$  MHz; (b) an unconstrained model.

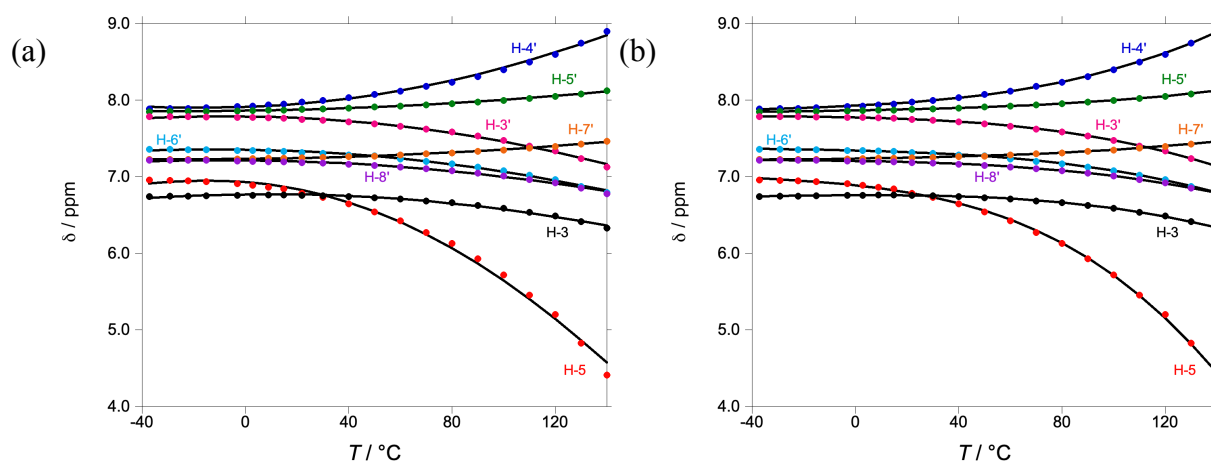

**Figure S36.** Temperature-dependence of  $^1\text{H}$  chemical shifts of  $(C,R,R)$ -(Bdan)Pd ( $\text{CDCl}_2\text{CDCl}_2$ ). Solid lines are fit to eq 1 with (a) a model with  $A_{\text{H-5}}$  constrained to be  $-5.90$  MHz; (b) an unconstrained model.

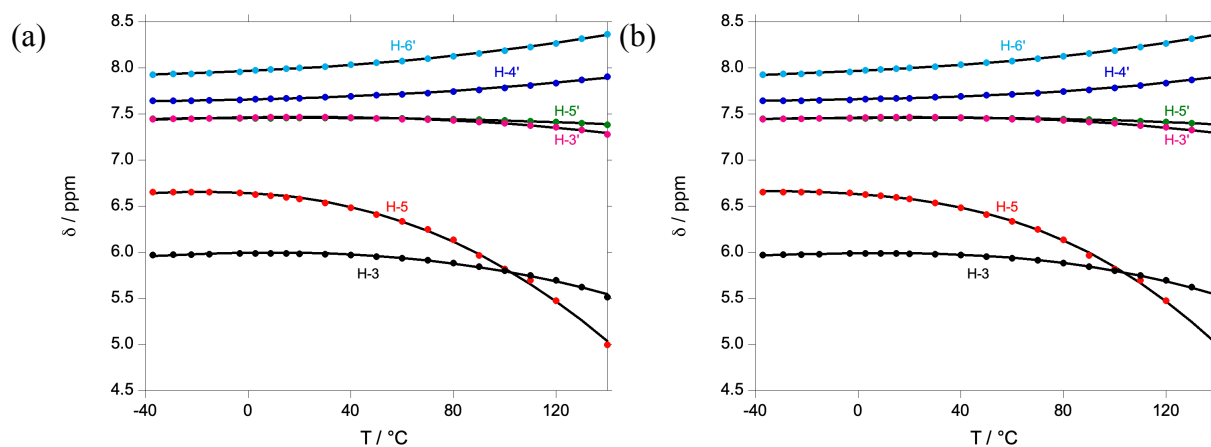

**Table S1.** Parameters describing temperature-dependent chemical shifts of  $(R)$ -(Biniq)Pd and  $(C,R,R)$ -(Bdan)Pd. *n. d.* = Not determined. *n. a.* = Not applicable.

|                            | $(R)$ -(Biniq)Pd    |                   |              | $(C,R,R)$ -(Bdan)Pd |                   |              |
|----------------------------|---------------------|-------------------|--------------|---------------------|-------------------|--------------|
|                            | Unconstrained model | Constrained model | DFT          | Unconstrained model | Constrained model | DFT          |
| $\Delta E, \text{cm}^{-1}$ | 2230(30)            | 1458(9)           | <i>n. d.</i> | 2050(30)            | 1729(4)           | <i>n. d.</i> |
| $A, \text{H-3, MHz}$       | -8.3(7)             | -1.01(9)          | -1.68        | -5.3(5)             | -2.12(7)          | -3.25        |
| $A, \text{H-5, MHz}$       | -37(3)              | -4.26             | -4.26        | -15.0(14)           | -5.90             | -5.90        |
| $A, \text{H-3', MHz}$      | -10.0(8)            | -1.22(9)          | -1.59        | -2.3(2)             | -0.96(7)          | -0.73        |
| $A, \text{H-4', MHz}$      | 13.6(11)            | 1.66(9)           | 2.26         | 1.8(2)              | 0.63(6)           | 0.96         |
| $A, \text{H-5', MHz}$      | 3.3(3)              | 0.40(9)           | 0.77         | -1.02(14)           | -0.37(6)          | -0.19        |
| $A, \text{H-6', MHz}$      | -8.2(7)             | -1.00(9)          | -1.36        | 2.2(2)              | 0.91(6)           | 0.88         |
| $A, \text{H-7', MHz}$      | 3.0(3)              | 0.37(9)           | 0.69         | <i>n. a.</i>        |                   |              |
| $A, \text{H-8', MHz}$      | -6.4(6)             | -0.77(9)          | -1.18        | <i>n. a.</i>        |                   |              |

## VII. Details of assignments of optical and chiroptical spectra

**Table S2.** Optical and chiroptical assignments for (*C,R,R*)-(Bdan)Pd (CH<sub>2</sub>Cl<sub>2</sub>).

| $\lambda_{\text{exptl}}$ , nm | $\epsilon_{\text{exptl}}$ , M <sup>-1</sup> cm <sup>-1</sup> | $\Delta\epsilon_{\text{exptl}}$ , M <sup>-1</sup> cm <sup>-1</sup> | $\lambda_{\text{calc}}$ , nm | $f_{\text{calc}}$ | $R_{\text{vel, calc}}$ (10 <sup>-40</sup> erg esu cm G <sup>-1</sup> ) | Assignment    |
|-------------------------------|--------------------------------------------------------------|--------------------------------------------------------------------|------------------------------|-------------------|------------------------------------------------------------------------|---------------|
| 876                           | 34600                                                        | +18.6                                                              | 840                          | 0.324             | +51.4                                                                  | HOMO→LUMO     |
| 677                           | 5100                                                         | -4.5                                                               | 653                          | 0.003             | -18.3                                                                  | HOMO-3→LUMO   |
| 574                           | 4000                                                         | -4.3                                                               | 542                          | 0.031             | -32.0                                                                  | HOMO-2→LUMO   |
| 430                           | 2400                                                         | +3.7                                                               | 433                          | 0.005             | +6.6                                                                   | HOMO-1→LUMO+1 |

**Table S3.** Optical and chiroptical assignments for (*R*)-(Biniq)Pd (CH<sub>2</sub>Cl<sub>2</sub>).

| $\lambda_{\text{exptl}}$ , nm | $\epsilon_{\text{exptl}}$ , M <sup>-1</sup> cm <sup>-1</sup> | $\Delta\epsilon_{\text{exptl}}$ , M <sup>-1</sup> cm <sup>-1</sup> | $\lambda_{\text{calc}}$ , nm | $f_{\text{calc}}$ | $R_{\text{vel, calc}}$ (10 <sup>-40</sup> erg esu cm G <sup>-1</sup> ) | Assignment  |
|-------------------------------|--------------------------------------------------------------|--------------------------------------------------------------------|------------------------------|-------------------|------------------------------------------------------------------------|-------------|
| 1031                          | 27400                                                        | -13.2                                                              | 1027                         | 0.150             | -88.4                                                                  | HOMO→LUMO   |
| 822                           | 11100                                                        | +5.6                                                               | 759                          | 0.059             | +119.2                                                                 | HOMO-1→LUMO |
| 600                           | 5000                                                         | +8.3                                                               | 612                          | 0.021             | +51.9                                                                  | HOMO→LUMO+1 |
| 530                           | 3400                                                         | -8.6                                                               | 590                          | 0.031             | -90.3                                                                  | HOMO-3→LUMO |
| 422                           | 13700                                                        | -44.7                                                              | 397                          | 0.041             | -168.1                                                                 | HOMO→LUMO+2 |

**Table S4.** Optical and chiroptical assignments for (*R*)-(Biniq)Pt (CH<sub>2</sub>Cl<sub>2</sub>).

| $\lambda_{\text{exptl}}$ , nm | $\epsilon_{\text{exptl}}$ , M <sup>-1</sup> cm <sup>-1</sup> | $\Delta\epsilon_{\text{exptl}}$ , M <sup>-1</sup> cm <sup>-1</sup> | $\lambda_{\text{calc}}$ , nm | $f_{\text{calc}}$ | $R_{\text{vel, calc}}$ (10 <sup>-40</sup> erg esu cm G <sup>-1</sup> ) | Assignment  |
|-------------------------------|--------------------------------------------------------------|--------------------------------------------------------------------|------------------------------|-------------------|------------------------------------------------------------------------|-------------|
| 924                           | 37000                                                        | -7.9                                                               | 866                          | 0.164             | -115.4                                                                 | HOMO→LUMO   |
| 704                           | 7300                                                         | +20.3                                                              | 683                          | 0.072             | +165.7                                                                 | HOMO-2→LUMO |
| 537                           | 2300                                                         | -15.3                                                              | 557                          | 0.046             | -105.7                                                                 | HOMO-3→LUMO |
| 426                           | 11500                                                        | +19.9                                                              | 457                          | 0.028             | +80.5                                                                  | HOMO→LUMO+1 |

**Table S5.** Optical and chiroptical assignments for (*C,R,R*)-(Bdan)OsO (CH<sub>2</sub>Cl<sub>2</sub>).

| $\lambda_{\text{exptl}}$ , nm | $\epsilon_{\text{exptl}}$ , M <sup>-1</sup> cm <sup>-1</sup> | $\Delta\epsilon_{\text{exptl}}$ , M <sup>-1</sup> cm <sup>-1</sup> | $\lambda_{\text{calc}}$ , nm | $f_{\text{calc}}$ | $R_{\text{vel, calc}}$ (10 <sup>-40</sup> erg esu cm G <sup>-1</sup> ) | Assignment    |
|-------------------------------|--------------------------------------------------------------|--------------------------------------------------------------------|------------------------------|-------------------|------------------------------------------------------------------------|---------------|
| 579                           | 2400                                                         | +3.0                                                               | 518                          | 0.004             | -1.1                                                                   | HOMO-1→LUMO   |
| 444                           | 13100                                                        | +15.4                                                              | 491                          | 0.065             | +68.8                                                                  | HOMO-1→LUMO+1 |
| 410                           |                                                              | +12.7                                                              | 431                          | 0.062             | +73.9                                                                  | HOMO-2→LUMO   |
| 358                           | 18800                                                        | -0.3                                                               | 360                          | 0.158             | +13.8                                                                  | HOMO→LUMO+2   |
| 333                           | 17000                                                        | +2.4                                                               | 339                          | 0.162             | +0.8                                                                   | HOMO→LUMO+3   |

### VIII. Structural comparison between (Clip)M and (Biniq)M (M = Pd, Pt)

**Figure S37.** Overlay of calculated structures of (Clip)Pd (pink solid lines) and (Biniq)Pd (green dashed lines). Structures have been oriented to align the nonhydrogen atoms of the Pd(iminoxolene)<sub>2</sub> core (rmsd = 0.017 Å for 17 atoms). Structures are viewed down the molecular twofold axis.

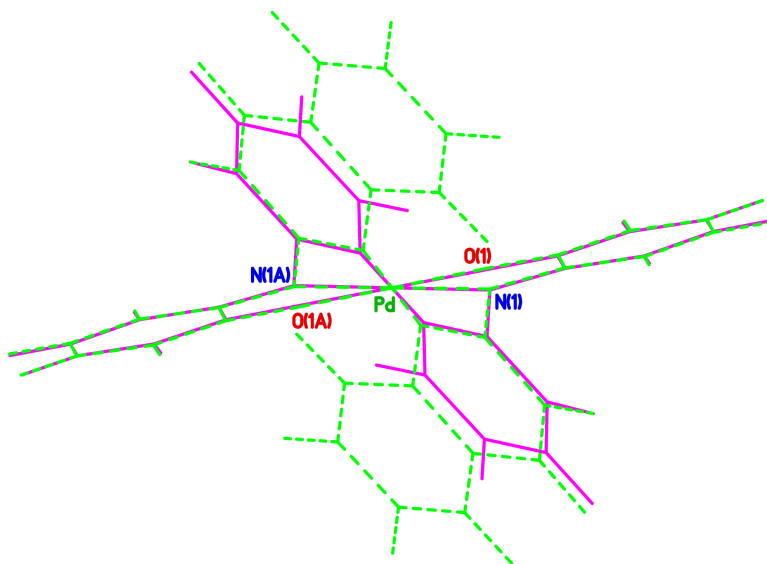

**Figure S38.** Overlay of calculated structures of (Clip)Pt (pink solid lines) and (Biniq)Pt (green dashed lines). Structures have been oriented to align the nonhydrogen atoms of the Pt(iminoxolene)<sub>2</sub> core (rmsd = 0.015 Å for 17 atoms). Structures are viewed down the molecular twofold axis.

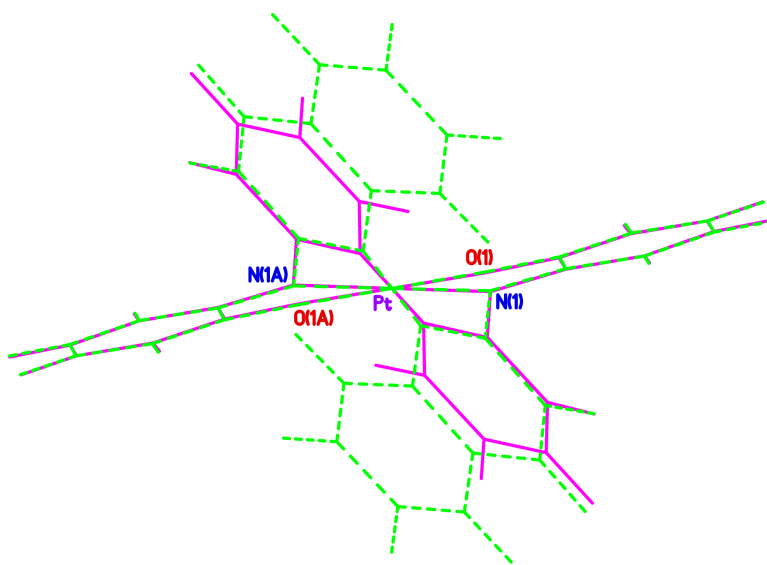

**Table S6.** Selected metrical data on calculated structures of (Clip)M and (Biniq)M (M = Pd, Pt).

|                                             | (Clip)Pd | (Biniq)Pd | (Clip)Pt | (Biniq)Pt |
|---------------------------------------------|----------|-----------|----------|-----------|
| M-O, Å                                      | 2.007    | 2.009     | 2.017    | 2.019     |
| M-N, Å                                      | 1.986    | 1.988     | 1.978    | 1.980     |
| Metrical oxidation state (MOS) <sup>1</sup> | -1.23(8) | -1.23(7)  | -1.34(7) | -1.34(7)  |
| C11-N1-M-N1A, °                             | 163.3    | 164.1     | 161.8    | 162.5     |
| M-N1-C22-C21, °                             | 57.4     | 57.8      | 55.6     | 55.8      |
| C22-C21-C21A-C22A, °                        | -61.5    | -71.0     | -62.0    | -71.7     |

## IX. Energies and Cartesian coordinates of calculated structures

All structures were optimized as singlets unless otherwise stated.

### A. (<sup>H</sup>ap)<sub>2</sub>Pd

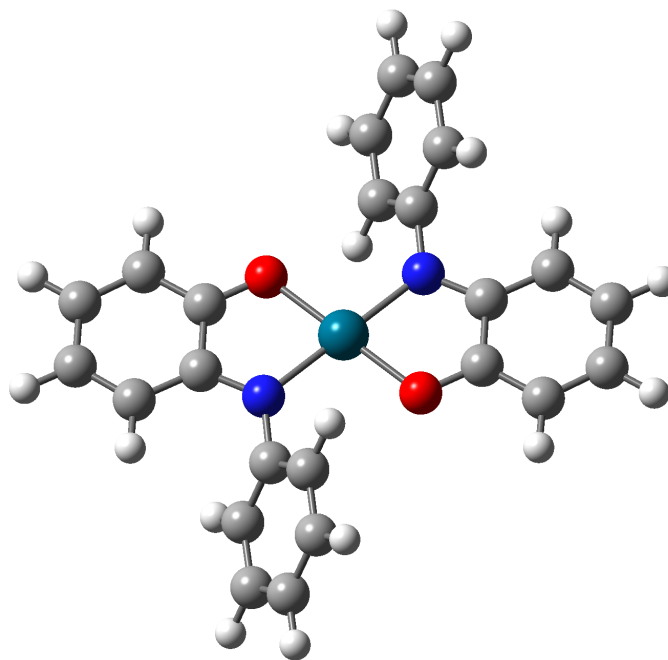

Energy of optimized structure = -1313.27725613 a.u.

Cartesian coordinates of optimized structure:

| Center Number | Atomic Number | Coordinates (Angstroms) |           |           |
|---------------|---------------|-------------------------|-----------|-----------|
|               |               | X                       | Y         | Z         |
| 1             | 46            | 0.000000                | 0.000000  | 0.000000  |
| 2             | 7             | -2.000157               | 0.057382  | 0.080777  |
| 3             | 8             | -0.252980               | 1.979773  | -0.153151 |
| 4             | 6             | -1.510005               | 2.344153  | -0.136318 |
| 5             | 6             | -2.514696               | 1.318980  | -0.000088 |
| 6             | 6             | -3.881950               | 1.697270  | 0.088566  |
| 7             | 1             | -4.641791               | 0.938599  | 0.235456  |
| 8             | 6             | -4.227220               | 3.031131  | 0.001454  |
| 9             | 1             | -5.271945               | 3.319471  | 0.073384  |
| 10            | 6             | -3.237766               | 4.031581  | -0.169291 |
| 11            | 1             | -3.538377               | 5.073508  | -0.236428 |
| 12            | 6             | -1.897605               | 3.699746  | -0.234156 |
| 13            | 1             | -1.122521               | 4.451370  | -0.345241 |
| 14            | 6             | -2.827418               | -1.087511 | 0.113071  |
| 15            | 6             | -3.807868               | -1.304666 | -0.872817 |
| 16            | 1             | -3.929988               | -0.578366 | -1.670457 |
| 17            | 6             | -4.590768               | -2.456156 | -0.838916 |
| 18            | 1             | -5.337987               | -2.617660 | -1.611260 |
| 19            | 6             | -4.411100               | -3.403165 | 0.173321  |

|    |   |           |           |           |
|----|---|-----------|-----------|-----------|
| 20 | 1 | -5.024732 | -4.299311 | 0.197642  |
| 21 | 6 | -3.433062 | -3.193779 | 1.148232  |
| 22 | 1 | -3.284037 | -3.926540 | 1.936624  |
| 23 | 6 | -2.639423 | -2.048838 | 1.119451  |
| 24 | 1 | -1.873285 | -1.882100 | 1.868173  |
| 25 | 7 | 2.000157  | -0.057382 | -0.080777 |
| 26 | 8 | 0.252980  | -1.979773 | 0.153151  |
| 27 | 6 | 1.510005  | -2.344153 | 0.136318  |
| 28 | 6 | 2.514696  | -1.318980 | 0.000088  |
| 29 | 6 | 3.881950  | -1.697270 | -0.088566 |
| 30 | 1 | 4.641791  | -0.938599 | -0.235456 |
| 31 | 6 | 4.227220  | -3.031131 | -0.001454 |
| 32 | 1 | 5.271945  | -3.319471 | -0.073384 |
| 33 | 6 | 3.237766  | -4.031581 | 0.169291  |
| 34 | 1 | 3.538377  | -5.073508 | 0.236428  |
| 35 | 6 | 1.897605  | -3.699746 | 0.234156  |
| 36 | 1 | 1.122521  | -4.451370 | 0.345241  |
| 37 | 6 | 2.827418  | 1.087511  | -0.113071 |
| 38 | 6 | 3.807868  | 1.304666  | 0.872817  |
| 39 | 1 | 3.929988  | 0.578366  | 1.670457  |
| 40 | 6 | 4.590768  | 2.456156  | 0.838916  |
| 41 | 1 | 5.337987  | 2.617660  | 1.611260  |
| 42 | 6 | 4.411100  | 3.403165  | -0.173321 |
| 43 | 1 | 5.024732  | 4.299311  | -0.197642 |
| 44 | 6 | 3.433062  | 3.193779  | -1.148232 |
| 45 | 1 | 3.284037  | 3.926540  | -1.936624 |
| 46 | 6 | 2.639423  | 2.048838  | -1.119451 |
| 47 | 1 | 1.873285  | 1.882100  | -1.868173 |

---

**B. (C,R,R)-(Bdan)Pd**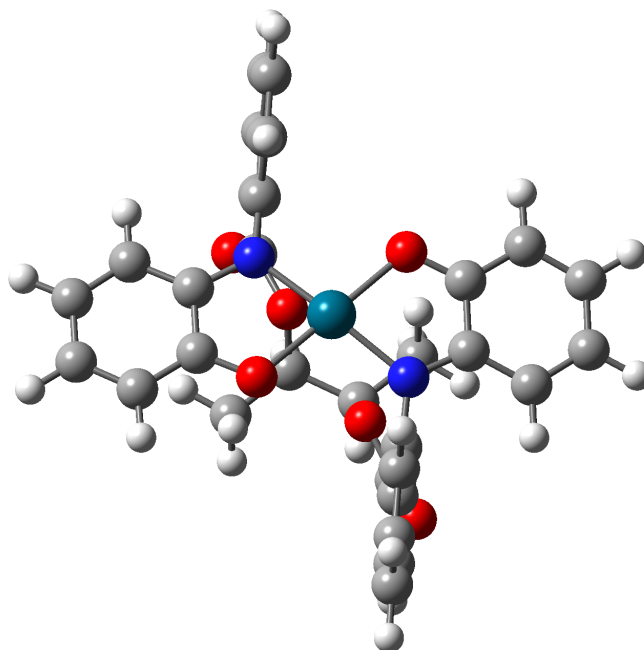

Energy of optimized structure = -1846.44593057 a.u.



Cartesian coordinates of optimized structure:

| Center<br>Number | Atomic<br>Number | Coordinates (Angstroms) |           |           |
|------------------|------------------|-------------------------|-----------|-----------|
|                  |                  | X                       | Y         | Z         |
| 1                | 46               | -0.000165               | 0.000489  | -1.132751 |
| 2                | 8                | -0.006754               | 2.009604  | -1.144357 |
| 3                | 8                | 0.006464                | -2.008658 | -1.145858 |
| 4                | 8                | -1.394179               | -0.219355 | 1.742151  |
| 5                | 8                | -3.306344               | -0.534996 | 2.913348  |
| 6                | 8                | 1.395021                | 0.216875  | 1.741921  |
| 7                | 8                | 3.307270                | 0.532302  | 2.913056  |
| 8                | 7                | -1.959144               | 0.297086  | -0.972366 |
| 9                | 7                | 1.958890                | -0.296023 | -0.973099 |
| 10               | 6                | -0.774903               | 1.804783  | 2.929483  |
| 11               | 1                | -1.817087               | 2.134370  | 2.971154  |
| 12               | 1                | -0.307429               | 2.218330  | 2.031991  |
| 13               | 1                | -0.256087               | 2.199221  | 3.810780  |
| 14               | 6                | -0.710389               | 0.281511  | 2.922201  |
| 15               | 1                | -1.228063               | -0.118591 | 3.798935  |
| 16               | 6                | 0.711639                | -0.285446 | 2.921576  |
| 17               | 1                | 1.229642                | 0.113536  | 3.798631  |
| 18               | 6                | 0.776127                | -1.808730 | 2.926884  |
| 19               | 1                | 1.818321                | -2.138394 | 2.967649  |
| 20               | 1                | 0.308229                | -2.221144 | 2.029088  |
| 21               | 1                | 0.257717                | -2.204274 | 3.807925  |
| 22               | 6                | -1.204024               | 2.517892  | -1.001494 |
| 23               | 6                | -2.312269               | 1.605115  | -0.855755 |
| 24               | 6                | -3.617515               | 2.116637  | -0.629754 |
| 25               | 1                | -4.450630               | 1.432238  | -0.511070 |
| 26               | 6                | -3.809873               | 3.483486  | -0.585329 |
| 27               | 1                | -4.808102               | 3.879754  | -0.423854 |
| 28               | 6                | -2.723383               | 4.378750  | -0.754411 |
| 29               | 1                | -2.905392               | 5.449178  | -0.715798 |
| 30               | 6                | -1.438500               | 3.910742  | -0.962406 |
| 31               | 1                | -0.594170               | 4.582024  | -1.083732 |
| 32               | 6                | 1.203807                | -2.516911 | -1.003426 |
| 33               | 6                | 2.312079                | -1.604105 | -0.857257 |
| 34               | 6                | 3.617373                | -2.115698 | -0.631672 |
| 35               | 1                | 4.450473                | -1.431338 | -0.512665 |
| 36               | 6                | 3.809788                | -3.482559 | -0.588043 |
| 37               | 1                | 4.808048                | -3.878874 | -0.426879 |
| 38               | 6                | 2.723332                | -4.377797 | -0.757547 |
| 39               | 1                | 2.905426                | -5.448233 | -0.719560 |
| 40               | 6                | 1.438397                | -3.909777 | -0.965164 |
| 41               | 1                | 0.594108                | -4.581056 | -1.086792 |
| 42               | 6                | -2.689679               | -0.578008 | 1.866250  |
| 43               | 6                | -3.275294               | -1.117474 | 0.594763  |
| 44               | 6                | -2.900052               | -0.734355 | -0.714434 |
| 45               | 6                | -3.481725               | -1.380779 | -1.812536 |
| 46               | 1                | -3.172062               | -1.079620 | -2.808280 |
| 47               | 6                | -4.440373               | -2.375536 | -1.630831 |
| 48               | 1                | -4.878061               | -2.864188 | -2.496896 |
| 49               | 6                | -4.840232               | -2.732458 | -0.341768 |
| 50               | 1                | -5.592860               | -3.500900 | -0.191802 |
| 51               | 6                | -4.261936               | -2.101514 | 0.756017  |
| 52               | 1                | -4.555224               | -2.364873 | 1.766817  |

|    |   |          |          |           |
|----|---|----------|----------|-----------|
| 53 | 6 | 2.690372 | 0.576051 | 1.866126  |
| 54 | 6 | 3.275440 | 1.117019 | 0.595033  |
| 55 | 6 | 2.899671 | 0.735353 | -0.714441 |
| 56 | 6 | 3.480667 | 1.383199 | -1.812053 |
| 57 | 1 | 3.170586 | 1.083157 | -2.808002 |
| 58 | 6 | 4.439212 | 2.377926 | -1.629623 |
| 59 | 1 | 4.876389 | 2.867690 | -2.495318 |
| 60 | 6 | 4.839621 | 2.733402 | -0.340332 |
| 61 | 1 | 5.592176 | 3.501809 | -0.189821 |
| 62 | 6 | 4.261953 | 2.101070 | 0.756986  |
| 63 | 1 | 4.555626 | 2.363329 | 1.767966  |

---

C. (*C,R,R*)-(Bdan)Pd triplet

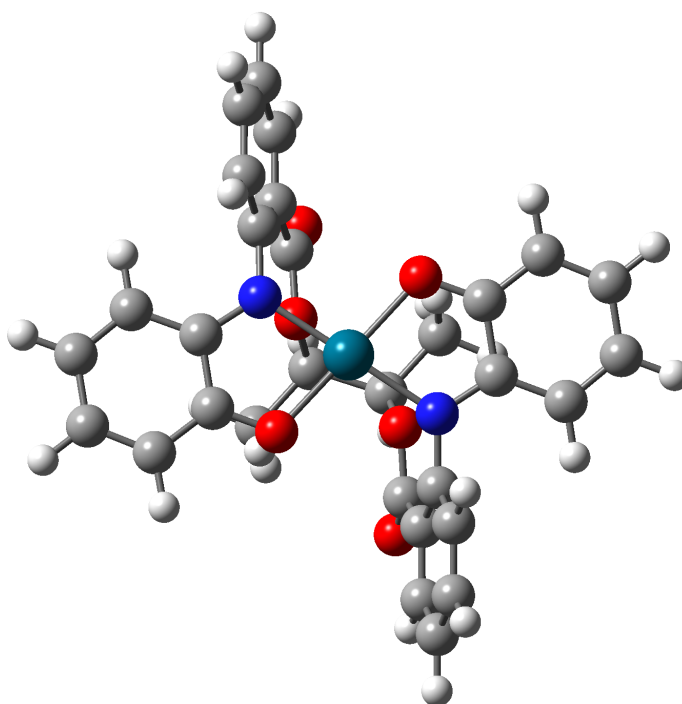

Energy of optimized structure = -1846.44952027 a.u.

Cartesian coordinates of optimized structure:

---

| Center<br>Number | Atomic<br>Number | Coordinates (Angstroms) |           |           |
|------------------|------------------|-------------------------|-----------|-----------|
|                  |                  | X                       | Y         | Z         |
| 1                | 46               | 0.000000                | -0.000000 | -0.929707 |
| 2                | 8                | -1.497966               | 1.373242  | -1.003967 |
| 3                | 8                | 1.497966                | -1.373242 | -1.003967 |
| 4                | 8                | -0.911383               | -1.127790 | 1.749612  |
| 5                | 8                | -0.656008               | -3.032732 | 2.941043  |
| 6                | 8                | 0.911383                | 1.127790  | 1.749612  |
| 7                | 8                | 0.656008                | 3.032732  | 2.941043  |
| 8                | 7                | -1.597500               | -1.261436 | -0.855603 |

---

|    |   |           |           |           |
|----|---|-----------|-----------|-----------|
| 9  | 7 | 1.597500  | 1.261436  | -0.855603 |
| 10 | 6 | -1.821633 | 0.744253  | 2.925841  |
| 11 | 1 | -2.794965 | 0.251577  | 3.013243  |
| 12 | 1 | -1.812996 | 1.327562  | 2.001002  |
| 13 | 1 | -1.697150 | 1.430826  | 3.768941  |
| 14 | 6 | -0.709120 | -0.297146 | 2.925585  |
| 15 | 1 | -0.783289 | -0.943351 | 3.804550  |
| 16 | 6 | 0.709120  | 0.297146  | 2.925585  |
| 17 | 1 | 0.783289  | 0.943351  | 3.804550  |
| 18 | 6 | 1.821633  | -0.744253 | 2.925841  |
| 19 | 1 | 2.794965  | -0.251577 | 3.013243  |
| 20 | 1 | 1.812996  | -1.327562 | 2.001002  |
| 21 | 1 | 1.697150  | -1.430826 | 3.768941  |
| 22 | 6 | -2.680879 | 0.822271  | -1.016515 |
| 23 | 6 | -2.785518 | -0.622514 | -0.914689 |
| 24 | 6 | -4.073628 | -1.228269 | -0.848487 |
| 25 | 1 | -4.150337 | -2.305642 | -0.748636 |
| 26 | 6 | -5.201798 | -0.441313 | -0.924093 |
| 27 | 1 | -6.184269 | -0.902573 | -0.882921 |
| 28 | 6 | -5.097404 | 0.969427  | -1.054749 |
| 29 | 1 | -6.003786 | 1.565718  | -1.114524 |
| 30 | 6 | -3.865163 | 1.593191  | -1.097222 |
| 31 | 1 | -3.770568 | 2.671249  | -1.181300 |
| 32 | 6 | 2.680879  | -0.822271 | -1.016515 |
| 33 | 6 | 2.785518  | 0.622514  | -0.914689 |
| 34 | 6 | 4.073628  | 1.228269  | -0.848487 |
| 35 | 1 | 4.150337  | 2.305642  | -0.748636 |
| 36 | 6 | 5.201798  | 0.441313  | -0.924093 |
| 37 | 1 | 6.184269  | 0.902573  | -0.882921 |
| 38 | 6 | 5.097404  | -0.969427 | -1.054749 |
| 39 | 1 | 6.003786  | -1.565718 | -1.114524 |
| 40 | 6 | 3.865163  | -1.593191 | -1.097222 |
| 41 | 1 | 3.770568  | -2.671249 | -1.181300 |
| 42 | 6 | -0.878776 | -2.470239 | 1.884359  |
| 43 | 6 | -1.141974 | -3.218260 | 0.609521  |
| 44 | 6 | -1.497966 | -2.656661 | -0.642081 |
| 45 | 6 | -1.720869 | -3.505829 | -1.736692 |
| 46 | 1 | -1.977827 | -3.055699 | -2.690673 |
| 47 | 6 | -1.601534 | -4.887294 | -1.611456 |
| 48 | 1 | -1.776345 | -5.522480 | -2.475560 |
| 49 | 6 | -1.253664 | -5.446936 | -0.380322 |
| 50 | 1 | -1.155281 | -6.523039 | -0.272251 |
| 51 | 6 | -1.030395 | -4.614836 | 0.710715  |
| 52 | 1 | -0.763943 | -5.025018 | 1.678524  |
| 53 | 6 | 0.878776  | 2.470239  | 1.884359  |
| 54 | 6 | 1.141974  | 3.218260  | 0.609521  |
| 55 | 6 | 1.497966  | 2.656661  | -0.642081 |
| 56 | 6 | 1.720869  | 3.505829  | -1.736692 |
| 57 | 1 | 1.977827  | 3.055699  | -2.690673 |
| 58 | 6 | 1.601534  | 4.887294  | -1.611456 |
| 59 | 1 | 1.776345  | 5.522480  | -2.475560 |
| 60 | 6 | 1.253664  | 5.446936  | -0.380322 |
| 61 | 1 | 1.155281  | 6.523039  | -0.272251 |
| 62 | 6 | 1.030395  | 4.614836  | 0.710715  |
| 63 | 1 | 0.763943  | 5.025018  | 1.678524  |

---

D. (*A,R,R*)-(Bdan)Pd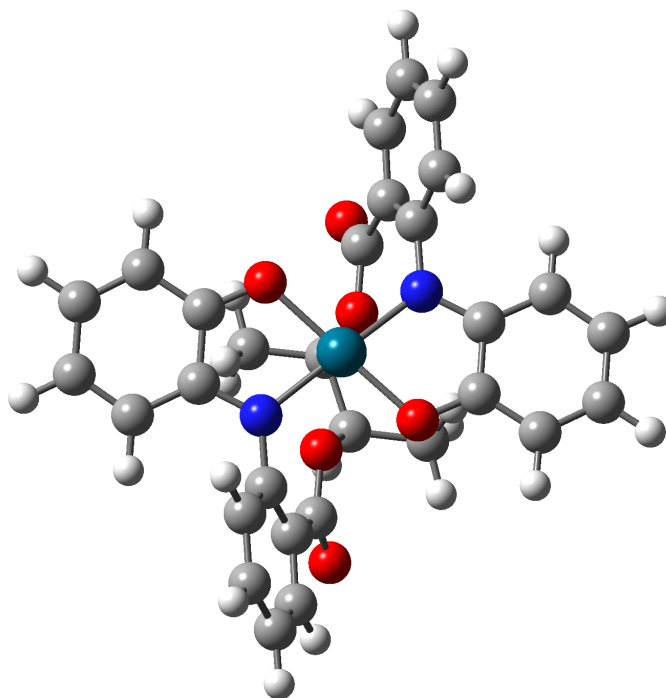

Energy of optimized structure = -1846.44487448 a.u.

Cartesian coordinates of optimized structure:

| Center<br>Number | Atomic<br>Number | Coordinates (Angstroms) |           |           |
|------------------|------------------|-------------------------|-----------|-----------|
|                  |                  | X                       | Y         | Z         |
| 1                | 46               | -0.000017               | 0.000090  | -0.875697 |
| 2                | 8                | -0.237402               | 1.993294  | -0.959059 |
| 3                | 8                | 0.237618                | -1.993028 | -0.958983 |
| 4                | 8                | 1.303977                | -0.515823 | 1.750147  |
| 5                | 8                | 2.833458                | -1.847323 | 2.730218  |
| 6                | 8                | -1.304052               | 0.515864  | 1.750026  |
| 7                | 8                | -2.833753               | 1.847032  | 2.730202  |
| 8                | 7                | 1.913670                | 0.538133  | -0.760161 |
| 9                | 7                | -1.913692               | -0.538063 | -0.760394 |
| 10               | 6                | -0.290764               | -1.941237 | 2.949886  |
| 11               | 1                | 0.417661                | -2.771393 | 2.989887  |
| 12               | 1                | -0.922367               | -2.047458 | 2.064803  |
| 13               | 1                | -0.927692               | -1.991383 | 3.840695  |
| 14               | 6                | 0.458235                | -0.612082 | 2.931120  |
| 15               | 1                | 1.108284                | -0.543854 | 3.809397  |
| 16               | 6                | -0.458397               | 0.612167  | 2.931055  |
| 17               | 1                | -1.108513               | 0.543987  | 3.809289  |
| 18               | 6                | 0.290546                | 1.941352  | 2.949782  |
| 19               | 1                | -0.417916               | 2.771443  | 2.989723  |
| 20               | 1                | 0.922159                | 2.047574  | 2.064706  |
| 21               | 1                | 0.927454                | 1.991582  | 3.840607  |
| 22               | 6                | 0.894868                | 2.646282  | -0.918019 |

|    |   |           |           |           |
|----|---|-----------|-----------|-----------|
| 23 | 6 | 2.115048  | 1.883693  | -0.789933 |
| 24 | 6 | 3.355439  | 2.567238  | -0.673167 |
| 25 | 1 | 4.271591  | 2.001105  | -0.546787 |
| 26 | 6 | 3.378005  | 3.946882  | -0.725233 |
| 27 | 1 | 4.325488  | 4.470925  | -0.639300 |
| 28 | 6 | 2.181752  | 4.691067  | -0.884662 |
| 29 | 1 | 2.230433  | 5.775714  | -0.923657 |
| 30 | 6 | 0.956542  | 4.057234  | -0.978493 |
| 31 | 1 | 0.028985  | 4.610576  | -1.086379 |
| 32 | 6 | -0.894625 | -2.646130 | -0.918064 |
| 33 | 6 | -2.114887 | -1.883691 | -0.790115 |
| 34 | 6 | -3.355195 | -2.567389 | -0.673385 |
| 35 | 1 | -4.271415 | -2.001376 | -0.547057 |
| 36 | 6 | -3.377601 | -3.947040 | -0.725405 |
| 37 | 1 | -4.325028 | -4.471187 | -0.639497 |
| 38 | 6 | -2.181254 | -4.691082 | -0.884748 |
| 39 | 1 | -2.229793 | -5.775737 | -0.923724 |
| 40 | 6 | -0.956120 | -4.057088 | -0.978506 |
| 41 | 1 | -0.028486 | -4.610311 | -1.086305 |
| 42 | 6 | 2.453530  | -1.218753 | 1.758359  |
| 43 | 6 | 3.232389  | -1.185656 | 0.472285  |
| 44 | 6 | 2.997935  | -0.366648 | -0.660808 |
| 45 | 6 | 3.862111  | -0.463132 | -1.765665 |
| 46 | 1 | 3.658189  | 0.162836  | -2.628893 |
| 47 | 6 | 4.933941  | -1.349035 | -1.771407 |
| 48 | 1 | 5.577157  | -1.410043 | -2.645017 |
| 49 | 6 | 5.170811  | -2.157392 | -0.657327 |
| 50 | 1 | 6.003648  | -2.854281 | -0.648065 |
| 51 | 6 | 4.329217  | -2.065234 | 0.444140  |
| 52 | 1 | 4.499361  | -2.674867 | 1.324250  |
| 53 | 6 | -2.453733 | 1.218589  | 1.758298  |
| 54 | 6 | -3.232594 | 1.185478  | 0.472232  |
| 55 | 6 | -2.998037 | 0.366586  | -0.660934 |
| 56 | 6 | -3.862179 | 0.463155  | -1.765813 |
| 57 | 1 | -3.658182 | -0.162685 | -2.629111 |
| 58 | 6 | -4.934076 | 1.348975  | -1.771492 |
| 59 | 1 | -5.577251 | 1.410041  | -2.645121 |
| 60 | 6 | -5.171065 | 2.157177  | -0.657327 |
| 61 | 1 | -6.003961 | 2.853995  | -0.648015 |
| 62 | 6 | -4.329495 | 2.064968  | 0.444149  |
| 63 | 1 | -4.499707 | 2.674499  | 1.324313  |

---

## E. (Clip)Pd

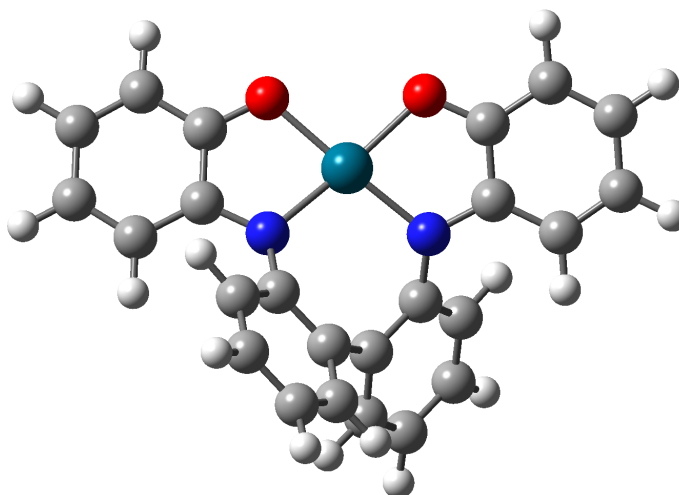

Energy of optimized structure =  $-1312.07123373$  a.u.

Cartesian coordinates of optimized structure:

| Center<br>Number | Atomic<br>Number | Coordinates (Angstroms) |           |           |
|------------------|------------------|-------------------------|-----------|-----------|
|                  |                  | X                       | Y         | Z         |
| 1                | 46               | 0.044222                | 0.000000  | 0.000000  |
| 2                | 8                | 1.395339                | -1.479992 | 0.101589  |
| 3                | 7                | -1.199614               | -1.532225 | -0.219529 |
| 4                | 6                | 0.833094                | -2.658308 | 0.184393  |
| 5                | 6                | 1.578445                | -3.836146 | 0.426871  |
| 6                | 1                | 2.649181                | -3.745563 | 0.579185  |
| 7                | 6                | 0.931917                | -5.056922 | 0.466579  |
| 8                | 1                | 1.502109                | -5.961383 | 0.660011  |
| 9                | 6                | -0.467785               | -5.146845 | 0.269991  |
| 10               | 1                | -0.957442               | -6.114175 | 0.333566  |
| 11               | 6                | -1.221524               | -4.015483 | 0.019241  |
| 12               | 1                | -2.296675               | -4.083131 | -0.108310 |
| 13               | 6                | -0.587860               | -2.748991 | -0.024906 |
| 14               | 6                | -2.389111               | -1.399518 | -0.941994 |
| 15               | 6                | -2.591936               | -2.218665 | -2.078036 |
| 16               | 1                | -1.809779               | -2.919967 | -2.347907 |
| 17               | 6                | -3.724726               | -2.106283 | -2.867516 |
| 18               | 1                | -3.831888               | -2.732605 | -3.748706 |
| 19               | 6                | -4.704568               | -1.164444 | -2.539152 |
| 20               | 1                | -5.593041               | -1.051931 | -3.153498 |
| 21               | 6                | -4.522665               | -0.353558 | -1.425202 |
| 22               | 1                | -5.276858               | 0.387256  | -1.177432 |
| 23               | 6                | -3.380790               | -0.431619 | -0.603256 |
| 24               | 8                | 1.395339                | 1.479992  | -0.101589 |
| 25               | 7                | -1.199614               | 1.532225  | 0.219529  |
| 26               | 6                | 0.833094                | 2.658308  | -0.184393 |
| 27               | 6                | 1.578445                | 3.836146  | -0.426871 |
| 28               | 1                | 2.649181                | 3.745563  | -0.579185 |
| 29               | 6                | 0.931917                | 5.056922  | -0.466579 |

|    |   |           |           |           |
|----|---|-----------|-----------|-----------|
| 30 | 1 | 1.502109  | 5.961383  | -0.660011 |
| 31 | 6 | -0.467785 | 5.146845  | -0.269991 |
| 32 | 1 | -0.957442 | 6.114175  | -0.333566 |
| 33 | 6 | -1.221524 | 4.015483  | -0.019241 |
| 34 | 1 | -2.296675 | 4.083131  | 0.108310  |
| 35 | 6 | -0.587860 | 2.748991  | 0.024906  |
| 36 | 6 | -2.389111 | 1.399518  | 0.941994  |
| 37 | 6 | -2.591936 | 2.218665  | 2.078036  |
| 38 | 1 | -1.809779 | 2.919967  | 2.347907  |
| 39 | 6 | -3.724726 | 2.106283  | 2.867516  |
| 40 | 1 | -3.831888 | 2.732605  | 3.748706  |
| 41 | 6 | -4.704568 | 1.164444  | 2.539152  |
| 42 | 1 | -5.593041 | 1.051931  | 3.153498  |
| 43 | 6 | -4.522665 | 0.353558  | 1.425202  |
| 44 | 1 | -5.276858 | -0.387256 | 1.177432  |
| 45 | 6 | -3.380790 | 0.431619  | 0.603256  |

---

### F. (Biniq)Pd

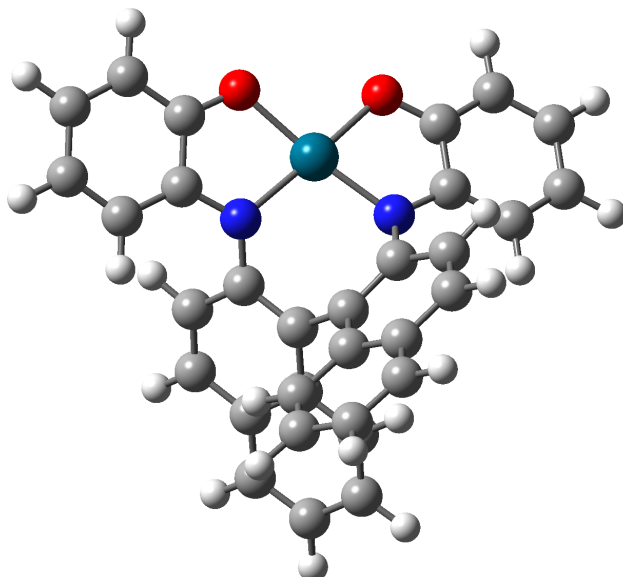

Energy of optimized structure = -1619.34523591 a.u.

Cartesian coordinates of optimized structure:

---

| Center<br>Number | Atomic<br>Number | Coordinates (Angstroms) |          |           |
|------------------|------------------|-------------------------|----------|-----------|
|                  |                  | X                       | Y        | Z         |
| 1                | 46               | 0.000000                | 0.000000 | 2.046777  |
| 2                | 7                | -0.708661               | 1.372411 | 0.794771  |
| 3                | 8                | -0.952467               | 1.152578 | 3.388794  |
| 4                | 6                | -1.689561               | 2.072257 | 2.820242  |
| 5                | 6                | -1.560036               | 2.265641 | 1.400072  |
| 6                | 6                | -2.304729               | 3.285493 | 0.759928  |
| 7                | 1                | -2.228241               | 3.412118 | -0.315085 |
| 8                | 6                | -3.158426               | 4.076642 | 1.506914  |

|    |   |           |           |           |
|----|---|-----------|-----------|-----------|
| 9  | 1 | -3.752954 | 4.839674  | 1.013121  |
| 10 | 6 | -3.283181 | 3.888160  | 2.904791  |
| 11 | 1 | -3.960260 | 4.523214  | 3.469457  |
| 12 | 6 | -2.564938 | 2.903786  | 3.557605  |
| 13 | 1 | -2.649060 | 2.742974  | 4.627630  |
| 14 | 6 | 0.497653  | 2.996623  | -0.541367 |
| 15 | 1 | 0.256191  | 3.730273  | 0.219707  |
| 16 | 6 | 1.303265  | 3.331022  | -1.591477 |
| 17 | 1 | 1.688496  | 4.343609  | -1.683028 |
| 18 | 6 | 1.698154  | 2.353963  | -2.545121 |
| 19 | 6 | 2.583333  | 2.676162  | -3.604485 |
| 20 | 1 | 2.937268  | 3.700773  | -3.690181 |
| 21 | 6 | 2.997525  | 1.714729  | -4.499664 |
| 22 | 1 | 3.679382  | 1.971395  | -5.305499 |
| 23 | 6 | 1.208134  | 1.014644  | -2.405245 |
| 24 | 6 | 1.675212  | 0.044552  | -3.338636 |
| 25 | 1 | 1.349509  | -0.984069 | -3.238806 |
| 26 | 6 | 2.542753  | 0.384477  | -4.353999 |
| 27 | 1 | 2.885627  | -0.380700 | -5.045046 |
| 28 | 6 | 0.305634  | 0.677177  | -1.331195 |
| 29 | 6 | -0.000000 | 1.663940  | -0.372009 |
| 30 | 7 | 0.708661  | -1.372411 | 0.794771  |
| 31 | 8 | 0.952467  | -1.152578 | 3.388794  |
| 32 | 6 | 1.689561  | -2.072257 | 2.820242  |
| 33 | 6 | 1.560036  | -2.265641 | 1.400072  |
| 34 | 6 | 2.304729  | -3.285493 | 0.759928  |
| 35 | 1 | 2.228241  | -3.412118 | -0.315085 |
| 36 | 6 | 3.158426  | -4.076642 | 1.506914  |
| 37 | 1 | 3.752954  | -4.839674 | 1.013121  |
| 38 | 6 | 3.283181  | -3.888160 | 2.904791  |
| 39 | 1 | 3.960260  | -4.523214 | 3.469457  |
| 40 | 6 | 2.564938  | -2.903786 | 3.557605  |
| 41 | 1 | 2.649060  | -2.742974 | 4.627630  |
| 42 | 6 | -0.497653 | -2.996623 | -0.541367 |
| 43 | 1 | -0.256191 | -3.730273 | 0.219707  |
| 44 | 6 | -1.303265 | -3.331022 | -1.591477 |
| 45 | 1 | -1.688496 | -4.343609 | -1.683028 |
| 46 | 6 | -1.698154 | -2.353963 | -2.545121 |
| 47 | 6 | -2.583333 | -2.676162 | -3.604485 |
| 48 | 1 | -2.937268 | -3.700773 | -3.690181 |
| 49 | 6 | -2.997525 | -1.714729 | -4.499664 |
| 50 | 1 | -3.679382 | -1.971395 | -5.305499 |
| 51 | 6 | -1.208134 | -1.014644 | -2.405245 |
| 52 | 6 | -1.675212 | -0.044552 | -3.338636 |
| 53 | 1 | -1.349509 | 0.984069  | -3.238806 |
| 54 | 6 | -2.542753 | -0.384477 | -4.353999 |
| 55 | 1 | -2.885627 | 0.380700  | -5.045046 |
| 56 | 6 | -0.305634 | -0.677177 | -1.331195 |
| 57 | 6 | 0.000000  | -1.663940 | -0.372009 |

---



## G. (Biniq)Pd triplet

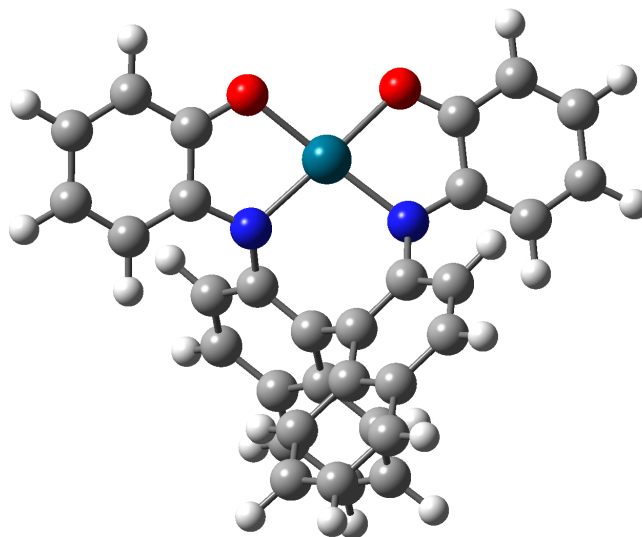

Energy of optimized structure =  $-1619.34600456$  a.u.

Cartesian coordinates of optimized structure:

| Center<br>Number | Atomic<br>Number | Coordinates (Angstroms) |           |           |
|------------------|------------------|-------------------------|-----------|-----------|
|                  |                  | X                       | Y         | Z         |
| 1                | 46               | 0.000000                | -0.000000 | 2.038683  |
| 2                | 7                | -0.750932               | 1.357898  | 0.740462  |
| 3                | 8                | -0.999371               | 1.177464  | 3.374936  |
| 4                | 6                | -1.722861               | 2.077382  | 2.774155  |
| 5                | 6                | -1.600272               | 2.241027  | 1.339492  |
| 6                | 6                | -2.344267               | 3.255074  | 0.680099  |
| 7                | 1                | -2.263108               | 3.357026  | -0.397446 |
| 8                | 6                | -3.188788               | 4.066695  | 1.408167  |
| 9                | 1                | -3.778512               | 4.825205  | 0.901947  |
| 10               | 6                | -3.310444               | 3.907361  | 2.814321  |
| 11               | 1                | -3.983776               | 4.558524  | 3.365215  |
| 12               | 6                | -2.595751               | 2.938558  | 3.488524  |
| 13               | 1                | -2.677355               | 2.806695  | 4.562665  |
| 14               | 6                | 0.549541                | 2.979020  | -0.535511 |
| 15               | 1                | 0.282962                | 3.726656  | 0.203359  |
| 16               | 6                | 1.434806                | 3.276992  | -1.535567 |
| 17               | 1                | 1.858409                | 4.275688  | -1.608865 |
| 18               | 6                | 1.846014                | 2.285007  | -2.464938 |
| 19               | 6                | 2.791930                | 2.570250  | -3.482591 |
| 20               | 1                | 3.197740                | 3.577137  | -3.546062 |
| 21               | 6                | 3.195862                | 1.595815  | -4.367921 |
| 22               | 1                | 3.923058                | 1.825080  | -5.141813 |
| 23               | 6                | 1.293135                | 0.964955  | -2.358507 |
| 24               | 6                | 1.735114                | -0.016274 | -3.293007 |
| 25               | 1                | 1.336553                | -1.022332 | -3.229285 |
| 26               | 6                | 2.662572                | 0.289759  | -4.264588 |
| 27               | 1                | 2.987278                | -0.480122 | -4.959264 |
| 28               | 6                | 0.332236                | 0.671441  | -1.332990 |

|    |   |           |           |           |
|----|---|-----------|-----------|-----------|
| 29 | 6 | -0.000000 | 1.665400  | -0.406289 |
| 30 | 7 | 0.750932  | -1.357898 | 0.740462  |
| 31 | 8 | 0.999371  | -1.177464 | 3.374936  |
| 32 | 6 | 1.722861  | -2.077382 | 2.774155  |
| 33 | 6 | 1.600272  | -2.241027 | 1.339492  |
| 34 | 6 | 2.344267  | -3.255074 | 0.680099  |
| 35 | 1 | 2.263108  | -3.357026 | -0.397446 |
| 36 | 6 | 3.188788  | -4.066695 | 1.408167  |
| 37 | 1 | 3.778512  | -4.825205 | 0.901947  |
| 38 | 6 | 3.310444  | -3.907361 | 2.814321  |
| 39 | 1 | 3.983776  | -4.558524 | 3.365215  |
| 40 | 6 | 2.595751  | -2.938558 | 3.488524  |
| 41 | 1 | 2.677355  | -2.806695 | 4.562665  |
| 42 | 6 | -0.549541 | -2.979020 | -0.535511 |
| 43 | 1 | -0.282962 | -3.726656 | 0.203359  |
| 44 | 6 | -1.434806 | -3.276992 | -1.535567 |
| 45 | 1 | -1.858409 | -4.275688 | -1.608865 |
| 46 | 6 | -1.846014 | -2.285007 | -2.464938 |
| 47 | 6 | -2.791930 | -2.570250 | -3.482591 |
| 48 | 1 | -3.197740 | -3.577137 | -3.546062 |
| 49 | 6 | -3.195862 | -1.595815 | -4.367921 |
| 50 | 1 | -3.923058 | -1.825080 | -5.141813 |
| 51 | 6 | -1.293135 | -0.964955 | -2.358507 |
| 52 | 6 | -1.735114 | 0.016274  | -3.293007 |
| 53 | 1 | -1.336553 | 1.022332  | -3.229285 |
| 54 | 6 | -2.662572 | -0.289759 | -4.264588 |
| 55 | 1 | -2.987278 | 0.480122  | -4.959264 |
| 56 | 6 | -0.332236 | -0.671441 | -1.332990 |
| 57 | 6 | 0.000000  | -1.665400 | -0.406289 |

---

### H. (<sup>H</sup>ap)<sub>2</sub>Pt

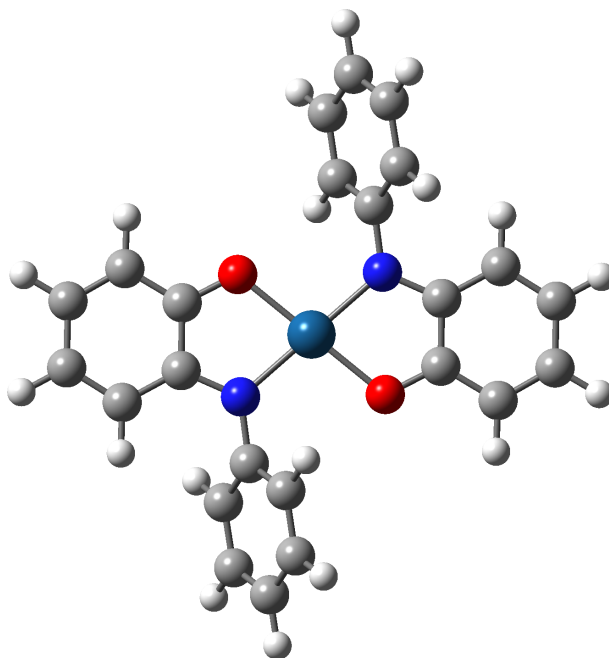

Energy of optimized structure = -1304.75826641 a.u.

Cartesian coordinates of optimized structure:

| Center<br>Number | Atomic<br>Number | Coordinates (Angstroms) |           |           |
|------------------|------------------|-------------------------|-----------|-----------|
|                  |                  | X                       | Y         | Z         |
| 1                | 78               | -0.000047               | 0.000015  | -0.000011 |
| 2                | 7                | -1.544700               | -1.259425 | -0.036654 |
| 3                | 8                | -1.493024               | 1.314117  | -0.309318 |
| 4                | 6                | -2.683829               | 0.759285  | -0.373729 |
| 5                | 6                | -2.766852               | -0.664683 | -0.221494 |
| 6                | 6                | -4.038936               | -1.290829 | -0.225184 |
| 7                | 1                | -4.115540               | -2.360864 | -0.071186 |
| 8                | 6                | -5.172750               | -0.522832 | -0.413038 |
| 9                | 1                | -6.148316               | -1.000176 | -0.412993 |
| 10               | 6                | -5.081316               | 0.877723  | -0.594912 |
| 11               | 1                | -5.988208               | 1.457724  | -0.741678 |
| 12               | 6                | -3.855084               | 1.518479  | -0.572560 |
| 13               | 1                | -3.764091               | 2.593385  | -0.691946 |
| 14               | 6                | -1.415392               | -2.670476 | 0.047999  |
| 15               | 6                | -1.907371               | -3.501920 | -0.972377 |
| 16               | 1                | -2.392996               | -3.056447 | -1.835138 |
| 17               | 6                | -1.744473               | -4.883048 | -0.885605 |
| 18               | 1                | -2.119013               | -5.516950 | -1.684758 |
| 19               | 6                | -1.095446               | -5.449595 | 0.214733  |
| 20               | 1                | -0.971705               | -6.526904 | 0.280001  |
| 21               | 6                | -0.601107               | -4.622865 | 1.225876  |
| 22               | 1                | -0.092316               | -5.054794 | 2.083264  |
| 23               | 6                | -0.752538               | -3.239525 | 1.145288  |
| 24               | 1                | -0.365929               | -2.589120 | 1.921922  |
| 25               | 7                | 1.544628                | 1.259420  | 0.036632  |
| 26               | 8                | 1.492898                | -1.314113 | 0.309375  |
| 27               | 6                | 2.683704                | -0.759283 | 0.373881  |
| 28               | 6                | 2.766740                | 0.664676  | 0.221606  |
| 29               | 6                | 4.038824                | 1.290819  | 0.225388  |
| 30               | 1                | 4.115448                | 2.360844  | 0.071344  |
| 31               | 6                | 5.172621                | 0.522834  | 0.413373  |
| 32               | 1                | 6.148184                | 1.000183  | 0.413401  |
| 33               | 6                | 5.081174                | -0.877720 | 0.595287  |
| 34               | 1                | 5.988057                | -1.457717 | 0.742151  |
| 35               | 6                | 3.854943                | -1.518476 | 0.572846  |
| 36               | 1                | 3.763932                | -2.593378 | 0.692251  |
| 37               | 6                | 1.415393                | 2.670470  | -0.048126 |
| 38               | 6                | 1.907289                | 3.501934  | 0.972262  |
| 39               | 1                | 2.392743                | 3.056484  | 1.835116  |
| 40               | 6                | 1.744506                | 4.883070  | 0.885386  |
| 41               | 1                | 2.118975                | 5.516989  | 1.684559  |
| 42               | 6                | 1.095682                | 5.449598  | -0.215081 |
| 43               | 1                | 0.972031                | 6.526917  | -0.280436 |
| 44               | 6                | 0.601431                | 4.622840  | -1.226248 |
| 45               | 1                | 0.092804                | 5.054751  | -2.083742 |
| 46               | 6                | 0.752740                | 3.239492  | -1.145545 |
| 47               | 1                | 0.366230                | 2.589091  | -1.922182 |

## I. (Clip)Pt

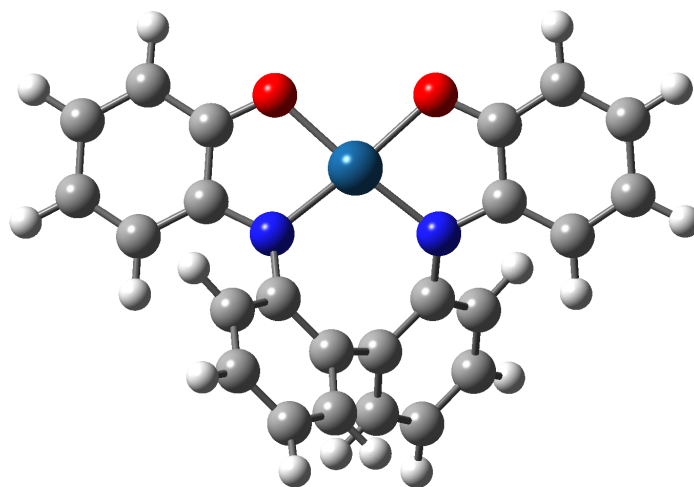

Energy of optimized structure =  $-1303.55180173$  a.u.

Cartesian coordinates of optimized structure:

| Center<br>Number | Atomic<br>Number | Coordinates (Angstroms) |           |           |
|------------------|------------------|-------------------------|-----------|-----------|
|                  |                  | X                       | Y         | Z         |
| 1                | 78               | 0.036602                | 0.000000  | 0.000000  |
| 2                | 8                | 1.391646                | -1.492901 | 0.066987  |
| 3                | 7                | -1.182651               | -1.539415 | -0.236826 |
| 4                | 6                | 0.833373                | -2.679651 | 0.165733  |
| 5                | 6                | 1.580493                | -3.852119 | 0.406858  |
| 6                | 1                | 2.653169                | -3.764210 | 0.546362  |
| 7                | 6                | 0.929473                | -5.071793 | 0.462797  |
| 8                | 1                | 1.499417                | -5.976405 | 0.655797  |
| 9                | 6                | -0.470744               | -5.158226 | 0.283069  |
| 10               | 1                | -0.962984               | -6.123528 | 0.356233  |
| 11               | 6                | -1.224613               | -4.024774 | 0.033674  |
| 12               | 1                | -2.300986               | -4.089069 | -0.085160 |
| 13               | 6                | -0.584004               | -2.765943 | -0.026969 |
| 14               | 6                | -2.385399               | -1.404664 | -0.948324 |
| 15               | 6                | -2.596418               | -2.227654 | -2.077623 |
| 16               | 1                | -1.820209               | -2.935303 | -2.347807 |
| 17               | 6                | -3.732647               | -2.111630 | -2.862456 |
| 18               | 1                | -3.848318               | -2.741816 | -3.739713 |
| 19               | 6                | -4.703904               | -1.161690 | -2.533600 |
| 20               | 1                | -5.594359               | -1.045323 | -3.144359 |
| 21               | 6                | -4.512602               | -0.349256 | -1.422807 |
| 22               | 1                | -5.261461               | 0.396376  | -1.173676 |
| 23               | 6                | -3.367684               | -0.432384 | -0.604072 |
| 24               | 8                | 1.391646                | 1.492901  | -0.066987 |
| 25               | 7                | -1.182651               | 1.539415  | 0.236826  |
| 26               | 6                | 0.833373                | 2.679651  | -0.165733 |
| 27               | 6                | 1.580493                | 3.852119  | -0.406858 |
| 28               | 1                | 2.653169                | 3.764210  | -0.546362 |
| 29               | 6                | 0.929473                | 5.071793  | -0.462797 |

|    |   |           |           |           |
|----|---|-----------|-----------|-----------|
| 30 | 1 | 1.499417  | 5.976405  | -0.655797 |
| 31 | 6 | -0.470744 | 5.158226  | -0.283069 |
| 32 | 1 | -0.962984 | 6.123528  | -0.356233 |
| 33 | 6 | -1.224613 | 4.024774  | -0.033674 |
| 34 | 1 | -2.300986 | 4.089069  | 0.085160  |
| 35 | 6 | -0.584004 | 2.765943  | 0.026969  |
| 36 | 6 | -2.385399 | 1.404664  | 0.948324  |
| 37 | 6 | -2.596418 | 2.227654  | 2.077623  |
| 38 | 1 | -1.820209 | 2.935303  | 2.347807  |
| 39 | 6 | -3.732647 | 2.111630  | 2.862456  |
| 40 | 1 | -3.848318 | 2.741816  | 3.739713  |
| 41 | 6 | -4.703904 | 1.161690  | 2.533600  |
| 42 | 1 | -5.594359 | 1.045323  | 3.144359  |
| 43 | 6 | -4.512602 | 0.349256  | 1.422807  |
| 44 | 1 | -5.261461 | -0.396376 | 1.173676  |
| 45 | 6 | -3.367684 | 0.432384  | 0.604072  |

### J. (Biniq)Pt

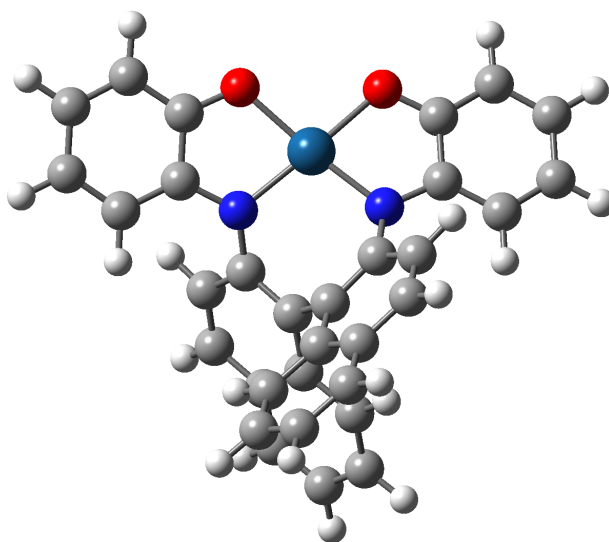

Energy of optimized structure = -1610.82544563 a.u.

Cartesian coordinates of optimized structure:

| Center<br>Number | Atomic<br>Number | Coordinates (Angstroms) |          |           |
|------------------|------------------|-------------------------|----------|-----------|
|                  |                  | X                       | Y        | Z         |
| 1                | 78               | 0.000000                | 0.000000 | 1.836636  |
| 2                | 7                | -0.697432               | 1.387630 | 0.607930  |
| 3                | 8                | -0.926827               | 1.185913 | 3.182295  |
| 4                | 6                | -1.683997               | 2.101184 | 2.616836  |
| 5                | 6                | -1.568715               | 2.278452 | 1.199408  |
| 6                | 6                | -2.327358               | 3.278792 | 0.551329  |
| 7                | 1                | -2.259976               | 3.394322 | -0.525601 |
| 8                | 6                | -3.180554               | 4.072939 | 1.298348  |
| 9                | 1                | -3.784977               | 4.825953 | 0.801299  |

|    |   |           |           |           |
|----|---|-----------|-----------|-----------|
| 10 | 6 | -3.288913 | 3.900969  | 2.697776  |
| 11 | 1 | -3.965310 | 4.536794  | 3.262302  |
| 12 | 6 | -2.554517 | 2.929806  | 3.355949  |
| 13 | 1 | -2.626661 | 2.781233  | 4.428572  |
| 14 | 6 | 0.486325  | 3.005829  | -0.754362 |
| 15 | 1 | 0.240856  | 3.744445  | 0.000425  |
| 16 | 6 | 1.287692  | 3.336140  | -1.809596 |
| 17 | 1 | 1.664910  | 4.350653  | -1.911940 |
| 18 | 6 | 1.688213  | 2.352402  | -2.753402 |
| 19 | 6 | 2.571335  | 2.670145  | -3.816346 |
| 20 | 1 | 2.919471  | 3.695921  | -3.911229 |
| 21 | 6 | 2.990612  | 1.703131  | -4.702674 |
| 22 | 1 | 3.670987  | 1.956181  | -5.510830 |
| 23 | 6 | 1.205695  | 1.011857  | -2.601672 |
| 24 | 6 | 1.677297  | 0.036360  | -3.526682 |
| 25 | 1 | 1.357049  | -0.993109 | -3.418276 |
| 26 | 6 | 2.543092  | 0.371933  | -4.545027 |
| 27 | 1 | 2.889922  | -0.397507 | -5.229240 |
| 28 | 6 | 0.304883  | 0.678743  | -1.523057 |
| 29 | 6 | -0.000000 | 1.672325  | -0.574851 |
| 30 | 7 | 0.697432  | -1.387630 | 0.607930  |
| 31 | 8 | 0.926827  | -1.185913 | 3.182295  |
| 32 | 6 | 1.683997  | -2.101184 | 2.616836  |
| 33 | 6 | 1.568715  | -2.278452 | 1.199408  |
| 34 | 6 | 2.327358  | -3.278792 | 0.551329  |
| 35 | 1 | 2.259976  | -3.394322 | -0.525601 |
| 36 | 6 | 3.180554  | -4.072939 | 1.298348  |
| 37 | 1 | 3.784977  | -4.825953 | 0.801299  |
| 38 | 6 | 3.288913  | -3.900969 | 2.697776  |
| 39 | 1 | 3.965310  | -4.536794 | 3.262302  |
| 40 | 6 | 2.554517  | -2.929806 | 3.355949  |
| 41 | 1 | 2.626661  | -2.781233 | 4.428572  |
| 42 | 6 | -0.486325 | -3.005829 | -0.754362 |
| 43 | 1 | -0.240856 | -3.744445 | 0.000425  |
| 44 | 6 | -1.287692 | -3.336140 | -1.809596 |
| 45 | 1 | -1.664910 | -4.350653 | -1.911940 |
| 46 | 6 | -1.688213 | -2.352402 | -2.753402 |
| 47 | 6 | -2.571335 | -2.670145 | -3.816346 |
| 48 | 1 | -2.919471 | -3.695921 | -3.911229 |
| 49 | 6 | -2.990612 | -1.703131 | -4.702674 |
| 50 | 1 | -3.670987 | -1.956181 | -5.510830 |
| 51 | 6 | -1.205695 | -1.011857 | -2.601672 |
| 52 | 6 | -1.677297 | -0.036360 | -3.526682 |
| 53 | 1 | -1.357049 | 0.993109  | -3.418276 |
| 54 | 6 | -2.543092 | -0.371933 | -4.545027 |
| 55 | 1 | -2.889922 | 0.397507  | -5.229240 |
| 56 | 6 | -0.304883 | -0.678743 | -1.523057 |
| 57 | 6 | -0.000000 | -1.672325 | -0.574851 |

---

## K. (C,R,R)-(Bdan)OsO

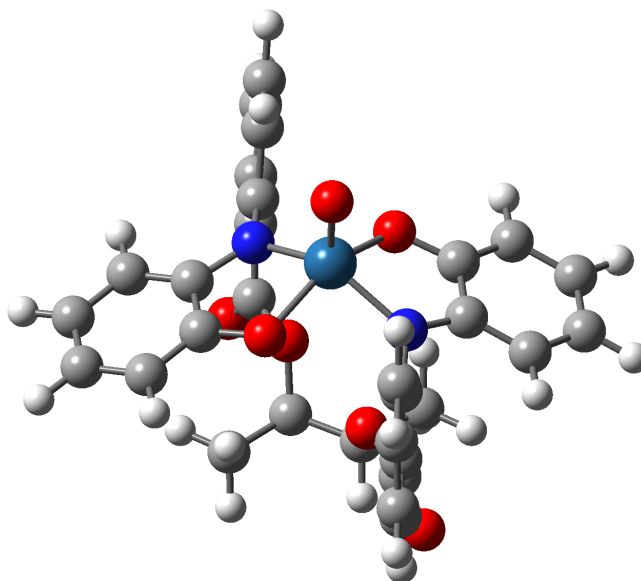

Energy of optimized structure = -1884.51453544 a.u.

Cartesian coordinates of optimized structure:

| Center<br>Number | Atomic<br>Number | Coordinates (Angstroms) |           |           |
|------------------|------------------|-------------------------|-----------|-----------|
|                  |                  | X                       | Y         | Z         |
| 1                | 76               | 0.000162                | -0.000646 | -1.468348 |
| 2                | 8                | 0.000312                | -0.001307 | -3.185913 |
| 3                | 8                | -0.305042               | -1.850236 | -0.887207 |
| 4                | 8                | 0.305224                | 1.849404  | -0.888558 |
| 5                | 8                | 1.369830                | 0.124367  | 1.934979  |
| 6                | 8                | 3.335972                | 0.280011  | 3.045536  |
| 7                | 8                | -1.370493               | -0.121951 | 1.934899  |
| 8                | 8                | -3.336783               | -0.277240 | 3.045262  |
| 9                | 7                | 1.806637                | -0.436835 | -0.815571 |
| 10               | 7                | -1.806447               | 0.435996  | -0.816279 |
| 11               | 6                | 0.698718                | -1.834177 | 3.217089  |
| 12               | 1                | 1.725943                | -2.208773 | 3.223349  |
| 13               | 1                | 0.172179                | -2.267382 | 2.363234  |
| 14               | 1                | 0.207737                | -2.164860 | 4.139688  |
| 15               | 6                | 0.696968                | -0.311462 | 3.148334  |
| 16               | 1                | 1.250450                | 0.097819  | 3.998321  |
| 17               | 6                | -0.697815               | 0.314998  | 3.147943  |
| 18               | 1                | -1.251423               | -0.093496 | 3.998251  |
| 19               | 6                | -0.699557               | 1.837777  | 3.215300  |
| 20               | 1                | -1.726766               | 2.212387  | 3.221054  |
| 21               | 1                | -0.172886               | 2.270195  | 2.361122  |
| 22               | 1                | -0.208695               | 2.169285  | 4.137661  |
| 23               | 6                | 0.812733                | -2.536621 | -0.527815 |
| 24               | 6                | 1.996960                | -1.783618 | -0.455018 |
| 25               | 6                | 3.190062                | -2.401812 | -0.065089 |
| 26               | 1                | 4.111975                | -1.832789 | -0.010179 |

|    |   |           |           |           |
|----|---|-----------|-----------|-----------|
| 27 | 6 | 3.174677  | -3.764849 | 0.243176  |
| 28 | 1 | 4.099143  | -4.250813 | 0.541065  |
| 29 | 6 | 1.989775  | -4.505232 | 0.170303  |
| 30 | 1 | 1.995584  | -5.563707 | 0.413433  |
| 31 | 6 | 0.793200  | -3.892398 | -0.212057 |
| 32 | 1 | -0.140612 | -4.442545 | -0.271931 |
| 33 | 6 | -0.812643 | 2.536028  | -0.529925 |
| 34 | 6 | -1.996859 | 1.783042  | -0.456753 |
| 35 | 6 | -3.190043 | 2.401462  | -0.067454 |
| 36 | 1 | -4.111928 | 1.832429  | -0.012257 |
| 37 | 6 | -3.174774 | 3.764731  | 0.239788  |
| 38 | 1 | -4.099303 | 4.250877  | 0.537173  |
| 39 | 6 | -1.989894 | 4.505112  | 0.166522  |
| 40 | 1 | -1.995786 | 5.563773  | 0.408837  |
| 41 | 6 | -0.793232 | 3.892049  | -0.215207 |
| 42 | 1 | 0.140558  | 4.442209  | -0.275364 |
| 43 | 6 | 2.693511  | 0.373685  | 2.017557  |
| 44 | 6 | 3.284942  | 0.858748  | 0.728288  |
| 45 | 6 | 2.836799  | 0.517407  | -0.567943 |
| 46 | 6 | 3.449342  | 1.101902  | -1.682766 |
| 47 | 1 | 3.090132  | 0.826503  | -2.669617 |
| 48 | 6 | 4.501587  | 2.003216  | -1.532163 |
| 49 | 1 | 4.960049  | 2.447034  | -2.411328 |
| 50 | 6 | 4.968715  | 2.318978  | -0.255544 |
| 51 | 1 | 5.795380  | 3.011586  | -0.127437 |
| 52 | 6 | 4.365850  | 1.742455  | 0.859586  |
| 53 | 1 | 4.712989  | 1.973978  | 1.860980  |
| 54 | 6 | -2.694108 | -0.371595 | 2.017478  |
| 55 | 6 | -3.285135 | -0.857996 | 0.728528  |
| 56 | 6 | -2.836548 | -0.518106 | -0.567934 |
| 57 | 6 | -3.448593 | -1.103976 | -1.682309 |
| 58 | 1 | -3.089019 | -0.829699 | -2.669339 |
| 59 | 6 | -4.500827 | -2.005194 | -1.531058 |
| 60 | 1 | -4.958911 | -2.450078 | -2.409883 |
| 61 | 6 | -4.968440 | -2.319480 | -0.254253 |
| 62 | 1 | -5.795106 | -3.011988 | -0.125655 |
| 63 | 6 | -4.366031 | -1.741626 | 0.860436  |
| 64 | 1 | -4.713508 | -1.972037 | 1.861988  |

---



L. (*A,R,R*)-(Bdan)OsO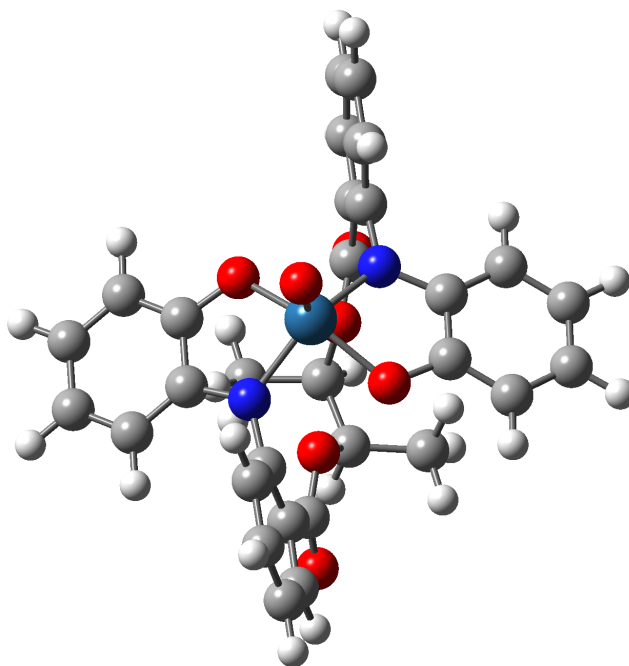

Energy of optimized structure =  $-1884.51052501$  a.u.

Cartesian coordinates of optimized structure:

| Center<br>Number | Atomic<br>Number | Coordinates (Angstroms) |           |           |
|------------------|------------------|-------------------------|-----------|-----------|
|                  |                  | X                       | Y         | Z         |
| 1                | 76               | 0.000043                | 0.000146  | -1.416406 |
| 2                | 8                | 0.000077                | 0.000269  | -3.133766 |
| 3                | 8                | 0.500212                | -1.817040 | -0.862132 |
| 4                | 8                | -0.500102               | 1.817268  | -0.861898 |
| 5                | 8                | -1.331895               | 0.352080  | 1.889722  |
| 6                | 8                | -3.187867               | 0.997518  | 3.000896  |
| 7                | 8                | 1.331768                | -0.352092 | 1.889745  |
| 8                | 8                | 3.187320                | -0.998809 | 3.000810  |
| 9                | 7                | -1.734810               | -0.624593 | -0.736346 |
| 10               | 7                | 1.734864                | 0.624693  | -0.736179 |
| 11               | 6                | -0.064645               | 1.959085  | 3.214233  |
| 12               | 1                | -0.913812               | 2.647801  | 3.222657  |
| 13               | 1                | 0.592473                | 2.213764  | 2.379656  |
| 14               | 1                | 0.489263                | 2.093224  | 4.150478  |
| 15               | 6                | -0.558057               | 0.519725  | 3.112674  |
| 16               | 1                | -1.218730               | 0.298464  | 3.955223  |
| 17               | 6                | 0.557825                | -0.519974 | 3.112606  |
| 18               | 1                | 1.218437                | -0.298932 | 3.955258  |
| 19               | 6                | 0.064258                | -1.959307 | 3.213824  |
| 20               | 1                | 0.913338                | -2.648137 | 3.222178  |
| 21               | 1                | -0.592829               | -2.213701 | 2.379135  |
| 22               | 1                | -0.489751               | -2.093566 | 4.149993  |
| 23               | 6                | -0.530042               | -2.610408 | -0.468604 |

|    |   |           |           |           |
|----|---|-----------|-----------|-----------|
| 24 | 6 | -1.782384 | -1.979042 | -0.366263 |
| 25 | 6 | -2.896027 | -2.705736 | 0.068304  |
| 26 | 1 | -3.866003 | -2.226938 | 0.151050  |
| 27 | 6 | -2.736672 | -4.057788 | 0.383956  |
| 28 | 1 | -3.597956 | -4.629491 | 0.717102  |
| 29 | 6 | -1.487232 | -4.678893 | 0.276421  |
| 30 | 1 | -1.381377 | -5.730611 | 0.525816  |
| 31 | 6 | -0.368336 | -3.955105 | -0.145426 |
| 32 | 1 | 0.613016  | -4.411397 | -0.228513 |
| 33 | 6 | 0.530177  | 2.610534  | -0.468222 |
| 34 | 6 | 1.782486  | 1.979095  | -0.365918 |
| 35 | 6 | 2.896153  | 2.705676  | 0.068776  |
| 36 | 1 | 3.866101  | 2.226823  | 0.151488  |
| 37 | 6 | 2.736857  | 4.057696  | 0.384596  |
| 38 | 1 | 3.598159  | 4.629313  | 0.717840  |
| 39 | 6 | 1.487449  | 4.678875  | 0.277103  |
| 40 | 1 | 1.381638  | 5.730566  | 0.526629  |
| 41 | 6 | 0.368533  | 3.955200  | -0.144872 |
| 42 | 1 | -0.612793 | 4.411555  | -0.227934 |
| 43 | 6 | -2.635838 | 0.691964  | 1.959873  |
| 44 | 6 | -3.343822 | 0.735592  | 0.637254  |
| 45 | 6 | -2.900121 | 0.189159  | -0.588337 |
| 46 | 6 | -3.653689 | 0.401555  | -1.749960 |
| 47 | 1 | -3.289657 | -0.023832 | -2.680333 |
| 48 | 6 | -4.842296 | 1.127431  | -1.716980 |
| 49 | 1 | -5.407369 | 1.279024  | -2.632349 |
| 50 | 6 | -5.299326 | 1.648384  | -0.506094 |
| 51 | 1 | -6.226273 | 2.212719  | -0.463221 |
| 52 | 6 | -4.553458 | 1.450083  | 0.651445  |
| 53 | 1 | -4.884606 | 1.854879  | 1.601204  |
| 54 | 6 | 2.635551  | -0.692565 | 1.959854  |
| 55 | 6 | 3.343725  | -0.735817 | 0.637315  |
| 56 | 6 | 2.900151  | -0.189106 | -0.588201 |
| 57 | 6 | 3.653812  | -0.401270 | -1.749801 |
| 58 | 1 | 3.289852  | 0.024297  | -2.680117 |
| 59 | 6 | 4.842423  | -1.127144 | -1.716867 |
| 60 | 1 | 5.407575  | -1.278550 | -2.632218 |
| 61 | 6 | 5.299343  | -1.648344 | -0.506050 |
| 62 | 1 | 6.226294  | -2.212675 | -0.463208 |
| 63 | 6 | 4.553353  | -1.450320 | 0.651458  |
| 64 | 1 | 4.884390  | -1.855361 | 1.601149  |

---

## References

---

S1 S. N. Brown, *Inorg. Chem.*, 2012, **51**, 1251-1260.
